1 **The LRRK2 G2019S mutation alters astrocyte-to-neuron communication via**  
2 **extracellular vesicles and induces neuron atrophy in a human iPSC-derived**  
3 **model of Parkinson's disease**

4

5 Aurelie de Rus Jacquet<sup>1\*</sup>, Jenna L. Tancredi<sup>1</sup>, Andrew L. Lemire<sup>1</sup>, Michael C. DeSantis<sup>1</sup>, Wei-  
6 Ping Li<sup>1</sup>, Erin K. O'Shea<sup>1\*</sup>

7 <sup>1</sup>Janelia Research Campus, Howard Hughes Medical Institute, Ashburn, VA, 20147

8 \*Co-corresponding authors: Aurelie de Rus Jacquet : aureliederus@gmail.com; Erin O'Shea :  
9 osheae@hhmi.org

10

11

12

13 **Abstract**

14 Astrocytes are essential cells of the central nervous system, characterized by dynamic  
15 relationships with neurons that range from functional metabolic interactions and regulation of  
16 neuronal firing activities, to the release of neurotrophic and neuroprotective factors. In  
17 Parkinson's disease (PD), dopaminergic neurons are progressively lost during the course of the  
18 disease, but the effects of PD on astrocytes and astrocyte-to-neuron communication remains  
19 largely unknown. This study focuses on the effects of the PD-related mutation LRRK2 G2019S  
20 in astrocytes, generated from patient-derived induced pluripotent stem cells. We report the  
21 alteration of extracellular vesicle (EV) biogenesis in astrocytes, and we identify the abnormal  
22 accumulation of key PD-related proteins within multi vesicular bodies (MVBs). We found that  
23 dopaminergic neurons internalize astrocyte-secreted EVs but LRRK2 G2019S EVs are  
24 abnormally enriched in neurites and provide only marginal neurotrophic support to dopaminergic  
25 neurons. Thus, dysfunctional astrocyte-to-neuron communication via altered EV biological  
26 properties may participate in the progression of PD.

27

28

## 1 Introduction

2 The loss of dopaminergic neurons in the *substantia nigra pars compacta* is associated with the  
3 severe and debilitating motor dysfunction observed in Parkinson's disease (PD) patients  
4 (Massano & Bhatia, 2012). The cause of dopaminergic neuron degeneration has been under  
5 intense investigation and has revealed the roles played by cellular stressors such as oxidative  
6 stress, mitochondrial dysfunction and disruption of protein degradation pathways (Dawson &  
7 Dawson, 2003; Lynch-Day, Mao, Wang, Zhao, & Klionsky, 2012). The dysregulation of these  
8 pathways within the neurons themselves represent cell-autonomous mechanisms of  
9 neurodegeneration, but neurons exist in a highly dynamic multicellular environment in which  
10 non-neuronal cells may also contribute to neuron loss (Allen & Lyons, 2018; Liddelow & Barres,  
11 2017). Among these non-neuronal populations, astrocytes are specialized in detecting and  
12 responding to neuronal signals to support their health and function (Allen & Eroglu, 2017;  
13 Banker, 1980), suggesting that impaired astrocytic functions could initiate or accelerate neuron  
14 loss. Neurons rely on astrocytes for regulation of their firing activities (Deemyad, Luthi, &  
15 Spruston, 2018), for trophic and metabolic support (Allen & Lyons, 2018), and detoxification of  
16 harmful factors (Ioannou et al., 2019). However, astrocytes can change from a resting to a  
17 reactive state in response to injury (Zamanian et al., 2012) or normal aging (Clarke et al., 2018).  
18 In fact, depending on the nature of the extracellular signals released after injury, astrocytes can  
19 protect neurons or induce neurotoxicity (Liddelow et al., 2017; Zamanian et al., 2012). The role  
20 of astrocytes in promoting neuron loss has been the focus of a number of studies across  
21 multiple neurodegenerative diseases including ALS (Di Giorgio, Boulting, Bobrowicz, & Eggan,  
22 2008; Haidet-Phillips et al., 2011), Huntington disease (Valenza et al., 2015), and PD (di  
23 Domenico et al., 2019; X. L. Gu et al., 2010). For example, studies showed that astrocytes with  
24 the ALS-causing mutation SOD1 G93A produced factors toxic to motor neurons (Di Giorgio et  
25 al., 2008), as well as failed to secrete factors that support the viability of neurons (Basso et al.,  
26 2013). These observations suggest that disease astrocytes undergo important functional  
27 changes that ultimately affect the viability of neurons. The consequences of PD-related  
28 mutations in the functionality of astrocytes and their ability to support neuronal survival are  
29 unclear, and much remains to be discovered to fully appreciate the unique contributions of  
30 astrocytes to PD pathogenesis.

31 Cell-to-cell communication refers to the exchange of information between two or more cells, and  
32 is mediated by several tightly regulated mechanisms including the secretion of signaling factors  
33 directly into the extracellular space or enclosed within extracellular vesicles (EVs). While  
34 astrocyte paracrine signaling via the secretion of soluble factors into the extracellular space has  
35 been the focus of many studies (Allen & Eroglu, 2017; Spampinato, Bortolotto, Canonico,  
36 Sortino, & Grilli, 2019), astrocyte communication via secreted EVs has not been well  
37 characterized. EVs represent a heterogeneous population of vesicles that can be further  
38 classified into different subtypes according to their size, biogenesis pathways and cargo.  
39 Microvesicles (~ 100 nm-1  $\mu$ m diameter) are formed by budding of the plasma membrane  
40 directly into the extracellular space, and their cargo resembles the cytoplasmic signature of the  
41 cell of origin (Pegtel & Gould, 2019). Exosomes (~ 40-120 nm) are formed by a tightly regulated  
42 inward budding of early endosomes to form exosome-containing multi vesicular bodies (MVBs),  
43 as well as by budding of the plasma membrane (Pegtel & Gould, 2019). The sorting and loading

1 of exosome cargo is an active and regulated process (Temoche-Diaz et al., 2019), and the  
2 regulatory factors involved in EV/exosome biogenesis are just beginning to be identified.  
3 Accumulating evidence suggests that the PD-related protein LRRK2 plays a role in vesicle  
4 trafficking, possibly via phosphorylation of Rab GTPase substrates (Alessi & Sammler, 2018;  
5 Steger et al., 2016). The PD-causing mutation G2019S occurs within the kinase domain of  
6 LRRK2, resulting in a hyper-active kinase form (West et al., 2005), which could affect the  
7 MVB/EV pathway. Furthermore, the nature of the EV cargo varies in health and disease  
8 (Chaudhuri et al., 2018; Lamontagne-Proulx et al., 2019). The composition of EVs isolated from  
9 the biofluids of PD patients is different from that of healthy controls (Fraser, Rawlins, et al.,  
10 2016; Lamontagne-Proulx et al., 2019; Shi et al., 2014), and they contain proteins associated  
11 with PD, such as LRRK2 and alpha-synuclein ( $\alpha$ Syn). The clinical observation that the EV  
12 profile is altered in PD patients, and the proposed role of LRRK2 in vesicle trafficking, open  
13 exciting opportunities to further investigate the relationships between EVs and PD pathogenesis  
14 in disease-relevant cell types.

15 Here we made use of human-based genetic model of PD using induced pluripotent stem cells  
16 (iPSCs) derived from PD patients with the LRRK2 G2019S mutation and its gene-corrected  
17 isogenic control (Reinhardt et al., 2013). The LRRK2 G2019S mutation is one of the most  
18 common genetic determinants associated with an increased risk to develop sporadic or familial  
19 PD (Bonifati, 2006; Kumari & Tan, 2009). We show that the LRRK2 G2019S mutation alters the  
20 phenotype of MVBs and secreted EVs by affecting the morphology and distribution of MVBs, the  
21 morphology of secreted EVs, and by over-accumulating the PD-related proteins LRRK2 and  
22 phospho-S129  $\alpha$ Syn in MVBs. Importantly, we show that astrocyte-derived EVs are internalized  
23 by dopaminergic neurons, and WT but not LRRK2 G2019S EVs support neuronal survival.  
24 Overall, this study supports a non-cell autonomous contribution to dopaminergic neuron loss in  
25 PD, and suggests pathologic dysregulation of EV-mediated astrocyte-to-neuron communication  
26 by the PD-related mutation LRRK2 G2019S.

27

## 28 **Results**

### 29 **Differentiation of LRRK2 G2019S iPSCs and gene-corrected isogenic controls into** 30 **neural progenitor cells and astrocytes**

31 We obtained iPSCs reprogrammed from the dermal fibroblasts of patients with the LRRK2  
32 G2019S mutation, and gene-corrected isogenic controls (Reinhardt et al., 2013). Karyotyping  
33 was carried out regularly to assess the chromosomal integrity of the iPSCs (Supplementary  
34 Figure 1A). In contrast to previous studies using control iPSCs derived from an unrelated  
35 healthy donor, the disease and control iPSC pairs differ only in a single point mutation in  
36 *LRRK2*. This isogenic wild-type control is essential to ensure that the experimental  
37 observations are a consequence of the mutation of interest, and do not result from differences in  
38 genetic background, or from differences that could arise during fibroblast reprogramming of  
39 each non-isogenic pair (Gore et al., 2011; Soldner et al., 2009). Since PD pathology significantly  
40 affects the region of the midbrain, we sought to prepare astrocytes from neural progenitor cells  
41 (NPCs) patterned toward a midbrain fate. We adapted the protocol developed by Kriks et al. to

1 generate a population of renewable midbrain-patterned NPCs that can differentiate into  
2 astrocytes or dopaminergic neurons, depending on exogenous cues (de Rus Jacquet, 2019;  
3 Kriks et al., 2011; Tcw et al., 2017). The midbrain and floor plate identity of the NPCs was  
4 systematically validated for each iPSC-to-NPC differentiation by RT-qPCR (Supplementary  
5 Figure 1B), and the differentiated NPCs expressed characteristic NPC markers such as  
6 vimentin, SOX1, nestin, and notch1 (Supplementary Figure 1C). Midbrain-patterned NPCs  
7 carrying the LRRK2 G2019S mutation or its isogenic control were differentiated into astrocytes  
8 as described previously (de Rus Jacquet, 2019; Tcw et al., 2017). As expected, the astrocytes  
9 expressed the markers GFAP, vimentin, and CD44 as demonstrated by immunofluorescence  
10 (Figure 1A) and flow cytometry analyses (Supplementary Figure 1D). To further demonstrate  
11 the successful differentiation of iPSCs into different cell types, we analyzed gene expression  
12 using RNA-sequencing analysis (RNA-seq), including primary human midbrain astrocyte  
13 samples in the RNA-seq study to serve as a positive control for human astrocyte identity. PCA  
14 and unsupervised cluster analyses separated iPSCs, NPCs and astrocytes into independent  
15 clusters (Supplementary Figure 1E-F). Importantly, the transcriptome of iPSC-derived  
16 astrocytes showed more similarities to fetal human midbrain astrocytes than to NPCs or iPSCs,  
17 validating their astrocyte identity (Supplementary Figure 1F).

18

## 19 **Expression of exosome components in iPSC-derived astrocytes is altered by the** 20 **LRRK2 G2019S mutation**

21 We analyzed the effects of the LRRK2 G2019S mutation on global gene expression patterns in  
22 iPSC-derived astrocytes using RNA-seq analysis. Differential gene expression analysis  
23 revealed that the LRRK2 G2019S mutation dysregulated the expression of a total of 752 genes  
24 (Figure 1B). Classification of these genes using k-means clustering showed that they are  
25 distributed between transcripts expressed at high, moderate and low levels based on their  
26  $\log_{10}(1+\text{normalized sequencing counts})$  value, suggesting that LRRK2 G2019S affects a broad  
27 range of targets (Figure 1B). Gene ontology (GO) analysis revealed that components of the  
28 extracellular compartment are the most up-regulated, and include the cell surface, extracellular  
29 matrix and extracellular exosomes (Figure 1D). The exosome component is the most  
30 significantly up-regulated GO term and is comprised of a total of 174 genes. The gene products  
31 associated with this category are proteins found in exosomes (e.g. CBR1), or proteins  
32 associated with exosome biogenesis (e.g. CD82) and trafficking (e.g. Rab27b) (Andreu &  
33 Yanez-Mo, 2014; Chiasserini et al., 2014; Ostrowski et al., 2010). Quantification of gene  
34 expression by RT-qPCR showed a 5-fold increase in the expression of *Rab27b*, and a 64-fold  
35 increase in *CD82*, in LRRK2 G2019S astrocytes compared to WT astrocytes (Figure 1E-F).  
36 Thus, the LRRK2 mutation G2019S leads to the significant up-regulation of exosome  
37 components in astrocytes.

38

## 39 **LRRK2 G2019S affects the size of MVBs in iPSC-derived astrocytes**

40 The exosome pathway is characterized by the formation of MVBs, endosome-derived structures  
41 that form exosomes via inward budding of the endosomal membrane (Pegtel & Gould, 2019).

1 Using transmission electron microscopy (TEM), we first confirmed that iPSC-derived astrocytes  
2 produce MVBs-like structures. We found that while both WT and LRRK2 G2019S astrocytes  
3 produce MVBs (Figure 2A), their average size is genotype-dependent. The area of MVBs in  
4 LRRK2 G2019S astrocytes is smaller than in WT astrocytes, with an average of  $0.26 \mu\text{m}^2$  (SEM  
5 = 0.02079) in LRRK2 G2019S and  $0.44 \mu\text{m}^2$  (SEM = 0.03472) in WT cells (Figure 2B). MVBs  
6 with an area smaller than  $0.2 \mu\text{m}^2$  are over-represented in LRRK2 G2019S compared to WT  
7 astrocytes, which range in area from  $0.1$  to  $1.2 \mu\text{m}^2$  (Figure 2C). Tetraspanins are  
8 transmembrane proteins, and the tetraspanin CD63 is enriched in exosomes and widely used  
9 as an exosomal marker (Escola et al., 1998; Men et al., 2019). However, cell-type specificities in  
10 the expression of exosomal markers such as CD63 have been documented (Jorgensen et al.,  
11 2013; Yoshioka et al., 2013). We therefore confirmed the presence of CD63-positive MVBs in  
12 iPSC-derived astrocytes by immunofluorescence (Figure 2D) and immunogold electron  
13 microscopy (IEM) (Figure 2E). IEM images showed the abundance of CD63 localized within  
14 MVBs in WT (Figure 2E) and LRRK2 G2019S (not shown) astrocytes, confirming that CD63 is a  
15 good marker of MVBs and exosomes in iPSC-derived astrocytes. These results demonstrate  
16 morphological defects in the MVBs produced by astrocytes derived from PD patients. Antibodies  
17 that target the CD63 protein accurately label astrocytic MVBs, and are therefore valuable  
18 markers to further characterize LRRK2 G2019S-dependent alterations in MVB-related  
19 pathways.

20

## 21 **LRRK2 G2019S affects the size of EVs secreted by iPSC-derived astrocytes**

22 The alteration of MVB size and the dysregulated expression of key components involved in  
23 MVB trafficking (such as Rab27b) suggests that EV biogenesis in astrocytes may be affected by  
24 the G2019S mutation. We therefore investigated if the LRRK2 G2019S mutation could affect the  
25 release and morphology of astrocyte-secreted EVs. We first analyzed iPSC-derived astrocytes  
26 by TEM and confirmed the presence of EVs that appear to be secreted by exocytosis (Figure  
27 3A), and by a mechanism that resembles membrane budding or shedding (Supplementary  
28 Figure 2A). We then collected and processed astrocyte conditioned media (ACM) by  
29 ultracentrifugation. Successive rounds of ultracentrifugation resulted in the isolation of an EV-  
30 enriched pellet, immediately prepared for cryogenic electron microscopy (cryo-EM) or stored for  
31 later analysis (Figure 3B). EVs form a heterogeneous population differing in their biogenesis  
32 pathway (endosomal or plasma membrane budding) and cargo (Pegtel & Gould, 2019;  
33 Temoche-Diaz et al., 2019). The unique characteristics of different EV populations are not fully  
34 understood, but the documentation of their size range and molecular signatures are commonly  
35 used to describe EV populations. The astrocyte-derived EV pellet is enriched in exosomes, as  
36 demonstrated by the expression of 8 exosomal markers and the absence of cellular  
37 contamination (Supplementary Figure 2B). Analysis of the EV pellet by ELISA showed a similar  
38 number of CD63<sup>+</sup> exosomes secreted by WT and LRRK2 G2019S astrocytes (Figure 3C). TEM  
39 and nanotracking particle analysis are common methods traditionally used to estimate the size  
40 distribution of EVs, but their accuracy is often challenged by sample processing artifacts and  
41 technical biases (Pegtel & Gould, 2019). To overcome these limitations, we used a cryo-EM  
42 approach to analyze the size of EVs secreted by WT and LRRK2 G2019S astrocytes. EVs



1 mostly displayed a circular morphology (as opposed to the cup-shaped morphology observed by  
2 TEM) (Figure 3D), but a variety of other shapes were also observed (Supplementary Figure 2C).  
3 WT astrocyte-secreted EVs displayed a large range of sizes, from 80 nm to greater than 600 nm  
4 in diameter, with a majority of EVs in the 120 - 480 nm range. In contrast, LRRK2 G2019S EVs  
5 are over-represented in the 160 - 280 nm diameter range, with only a few EVs smaller than 120  
6 nm (Figure 3E). We conclude from these results that astrocytes with the PD-related mutation  
7 LRRK2 G2019S do not produce or release the full size range of EVs compared to wild-type  
8 astrocytes.

9

## 10 **LRRK2 is associated with MVBs and EVs in iPSC-derived astrocytes**

11 In light of our observations that mutations in LRRK2 result in altered astrocytic MVB and EV  
12 phenotypes, we asked if LRRK2 is directly associated with MVBs in astrocytes and if this  
13 association is altered by the LRRK2 G2019S mutation. We analyzed and quantified the co-  
14 localization of the MVB marker CD63 with LRRK2 (Figure 4A), and found that the proportion of  
15 LRRK2<sup>+</sup>/CD63<sup>+</sup> structures remains unchanged between WT and LRRK2 G2019S astrocytes  
16 (Figure 4B). However, this immunofluorescence analysis does not discriminate between LRRK2  
17 signal localized at the periphery or within CD63<sup>+</sup> structures. To reveal the localization of LRRK2  
18 in finer detail, we analyzed IEM images which demonstrated that LRRK2 (small gold) is  
19 localized both in the vicinity of and inside CD63<sup>+</sup> MVBs (large gold) (Figure 4C). Importantly,  
20 small gold LRRK2 was more frequently localized inside MVBs in LRRK2 G2019S astrocytes  
21 compared to WT astrocytes – 65 % of MVBs in LRRK2 G2019S astrocytes are LRRK2<sup>+</sup>/CD63<sup>+</sup>  
22 vs only 44 % in WT astrocytes. LRRK2 G2019S astrocytes contained an average of 1.8 LRRK2  
23 small gold particles per MVB compared to only 0.9 small gold particles in WT astrocytes, and  
24 MVB populations containing more than 5 LRRK2 small gold particles were only observed in  
25 LRRK2 G2019S astrocytes (Figure 4D). We then performed imaging and biochemical analyses  
26 to determine if astrocytes secrete LRRK2 in EVs. IEM revealed the co-localization of CD63 and  
27 LRRK2 at the plasma membrane (Figure 4E), and ELISA analysis confirmed the presence of  
28 LRRK2 in EV-enriched fractions isolated from ACM (Supplementary Figure 3A). We conclude  
29 that LRRK2 is associated with MVBs in astrocytes and is secreted in astrocyte-derived EVs, and  
30 the PD-related LRRK2 G2019S mutation results in the abnormal accumulation of LRRK2 inside  
31 MVBs and EVs.

32

## 33 **The LRRK2 mutation G2019S alters MVB distribution in iPSC-derived astrocytes**

34 The proposed role of LRRK2 in vesicle trafficking (Alessi & Sammler, 2018; Steger et al., 2016),  
35 in addition to the dysregulation of known factors involved in exosome/MVB trafficking in mutant  
36 astrocytes (Figure 1E), and accumulation of LRRK2 in mutant MVBs (Figure 4D) suggested that  
37 the trafficking or spatial distribution of vesicles could be disrupted in LRRK2 G2019S astrocytes.  
38 To gain further insight into the functional role of LRRK2 in the MVB pathway, we used  
39 immunofluorescence to probe the spatial distribution of CD63<sup>+</sup> MVBs in WT and LRRK2  
40 G2019S astrocytes (Figure 5A). We measured the distance of CD63<sup>+</sup> structures to the nucleus  
41 and found that CD63<sup>+</sup> MVBs accumulated primarily in the perinuclear region of WT astrocytes

1 (Figure 5B). In contrast, CD63<sup>+</sup> MVBs were less clustered near the nucleus in LRRK2 G2019S  
2 cells. The median distance of CD63<sup>+</sup> MVBs to the nuclear membrane was 9.2  $\mu$ m in LRRK2  
3 G2019S astrocytes compared to 4.8  $\mu$ m in WT astrocytes. Furthermore, 75 % of the WT CD63<sup>+</sup>  
4 MVBs were localized at a distance to the nucleus smaller than 11.23  $\mu$ m, compared to 19.34  $\mu$ m  
5 in LRRK2 G2019S astrocytes (Figure 5B-C). The observation that LRRK2 G2019S disrupts the  
6 perinuclear distribution of CD63<sup>+</sup> MVBs suggests that their localization is influenced by the  
7 LRRK2 protein, and this cellular organization is altered in the astrocytes of PD patients.

8

## 9 **The LRRK2 G2019S mutation increases the amount of phosphorylated alpha** 10 **synuclein (Ser129) in MVBs**

11 EVs isolated from the biofluids of PD patients exhibit accumulation of  $\alpha$ Syn (Lamontagne-Proulx  
12 et al., 2019; Shi et al., 2014; Zhao et al., 2018), a hallmark protein whose phosphorylation at the  
13 serine residue 129 (p- $\alpha$ Syn) has been associated with accelerated PD pathogenesis (Fujiwara  
14 et al., 2002; Gorbatyuk et al., 2008). Since the MVB/EV secretion pathway is altered in our  
15 LRRK2 G2019S model of PD, we reasoned that mutant astrocytes might produce  $\alpha$ Syn-  
16 enriched EVs by accumulating the protein in its native or phosphorylated form in MVBs or EVs.  
17 IEM analysis revealed an abundance of p- $\alpha$ Syn (small gold) inside and in the vicinity of MVBs of  
18 LRRK2 G2019S iPSC-derived astrocytes, but not WT astrocytes (Figure 6A). We observed that  
19 55 % of the CD63<sup>+</sup> (large gold) MVBs in LRRK2 G2019S astrocytes are also p- $\alpha$ Syn<sup>+</sup> (small  
20 gold), compared to only 16 % in WT MVBs. LRRK2 G2019S astrocytes contained on average  
21 1.3 p- $\alpha$ Syn small gold particles per MVB compared to only 0.16 small gold particles in WT  
22 astrocytes, and MVB populations containing more than 3 p- $\alpha$ Syn small gold particles were only  
23 observed in LRRK2 G2019S astrocytes (Figure 6B). When we analyzed the content of EVs by  
24 ELISA, we found that total  $\alpha$ Syn levels in EV-enriched fractions are similar between WT and  
25 LRRK2 G2019S (Supplementary Figure 3B). These results suggest that astrocytes secrete  
26  $\alpha$ Syn-containing EVs, and the LRRK2 G2019S mutation enhances the accumulation of the  
27 pathologic p- $\alpha$ Syn in MVB-related astrocyte secretory pathways.

28

## 29 **Exosomes secreted by iPSC-derived astrocytes are internalized by iPSC-derived** 30 **dopaminergic neurons**

31 EVs have been suggested to mediate astrocyte paracrine signaling and affect neuronal health  
32 (Basso et al., 2013; Chaudhuri et al., 2018; Pascua-Maestro et al., 2018); it is therefore  
33 important to understand the pattern of astrocyte-derived EV uptake by dopaminergic neurons in  
34 health and disease. We investigated the internalization of WT and LRRK2 G2019S astrocyte-  
35 derived exosomes by dopaminergic neurons to identify genotype-dependent alterations in  
36 astrocyte-to-neuron exosome shuttling. To monitor production of EVs by astrocytes and assess  
37 uptake by neurons, we fluorescently labeled exosomes in astrocytes with one color (CD63-GFP)  
38 and labeled neurons with a second color (tdTomato). Subsequently, astrocytes and neurons  
39 were co-cultured, and the uptake of green-labeled exosomes by dopaminergic neurons was  
40 monitored by live-cell confocal microscopy (Figure 7A-B). We produced a 3D reconstitution of  
41 neurons and exosomes, and segmented intracellular and extracellular exosomal populations

1 (Figure 7B). We observed the presence of astrocyte-derived exosomes in the somas and  
2 neurites of dopaminergic neurons (Figure 7Bvi), and endocytosis of extracellular exosomes  
3 (Supplementary Figure 4). We then sought to determine if the efficiency of exosome uptake by  
4 dopaminergic neurons was influenced by the astrocyte genotype. We co-cultured dopaminergic  
5 neurons with either WT or G2019S astrocytes, but did not observe a difference in the proportion  
6 of exosome-containing neurons. On average, 40 % of the dopaminergic neurons had  
7 internalized exosomes regardless of the astrocyte genotype (Figure 7C). Although there was no  
8 difference in the amount of exosomes internalized by neurons exposed to either WT or LRRK2  
9 G2019S astrocytes (Figure 7D), exosomes were significantly over-represented in the neurites of  
10 neurons exposed to LRRK2 G2019S astrocytes (Figure 7E). These results show that astrocyte-  
11 secreted CD63<sup>+</sup> exosomes are internalized by neurons, but in the presence of PD astrocytes  
12 the pattern of uptake of exosomes is changed, suggesting that the astrocyte-to-neuron shuttling  
13 of EV-enclosed proteins may be affected.

14

### 15 **LRRK2 G2019S iPSC-derived astrocytes induce a non-cell autonomous loss of** 16 **iPSC-derived dopaminergic neurons**

17 To further determine the functional consequences of the LRRK2 G2019S mutation in astrocyte-  
18 to-neuron communication, we investigated the impact of WT or LRRK2 G2019S astrocytes on  
19 neuronal health. We co-cultured astrocytes and dopaminergic neurons for 14 days and  
20 observed a loss of and morphological changes to dopaminergic neurons in presence mutant  
21 astrocytes (Figure 8A-B). The neuronal dendrites shortened from an average of 60  $\mu\text{m}$  in WT to  
22 45  $\mu\text{m}$  in LRRK2 G2019S cultures (Figure 8C). These results are in agreement with previous  
23 observations that LRRK2 G2019S astrocytes induce loss of dopaminergic neurons compared to  
24 astrocytes derived from a healthy (non-isogenic) donor (di Domenico et al., 2019). To determine  
25 if these morphological changes are mediated by direct contact between astrocytes and neurons  
26 or if they rely solely on astrocyte secreted factors, dopaminergic neurons were cultured in ACM  
27 prepared from WT or LRRK2 G2019S astrocytes. After 14 days in culture, the average dendrite  
28 length of dopaminergic neurons exposed to WT ACM was 64.4  $\mu\text{m}$ , compared to 50.3  $\mu\text{m}$  if the  
29 dopaminergic neurons were exposed to basal NB/B27 medium (Figure 8E). This observation  
30 suggests that WT ACM, but not basal medium, contains neurotrophic factors necessary for  
31 dendrite outgrowth. LRRK2 G2019S ACM mimicked the phenotype observed by direct co-  
32 culture, with a 26 % increase in the number of short neurites (0-40  $\mu\text{m}$ ), and the absence of long  
33 neurites (160-200  $\mu\text{m}$ ) compared to neurons exposed to WT ACM (Figure 8F). The average  
34 dendrite length of dopaminergic neurons cultured in basal medium or LRRK2 G2019S ACM is  
35 equivalent (50.3  $\mu\text{m}$  vs 49.1  $\mu\text{m}$  respectively) (Figure 8E). We conclude from our observations  
36 that the morphological atrophy in dopaminergic neurons may result from a lack of neurotrophic  
37 support by the LRRK2 G2019S astrocyte secretome.

38

### 39 **Two distinct secretory pathways contribute to the trophic support of iPSC-** 40 **derived dopaminergic neurons by WT but not LRRK2 G2019S iPSC-derived** 41 **astrocytes**



1 The astrocyte secretome comprises factors directly secreted into the medium as well as factors  
2 enclosed in EVs. We therefore assessed the neurotrophic potential of EVs vs EV-free medium  
3 prepared from WT or LRRK2 G2019S astrocytes. We collected ACM and prepared EV-free and  
4 EV-enriched fractions using sequential ultracentrifugation (Figure 3B). Dopaminergic neurons  
5 were cultured for 14 days in basal medium, or EV-free medium prepared from WT or LRRK2  
6 G2019S astrocytes. WT EV-free medium promoted neuronal health, as evidenced by an  
7 average dendrite outgrowth of 60.3  $\mu\text{m}$  compared to 51  $\mu\text{m}$  in basal medium (Figure 9A). In  
8 contrast, LRRK2 G2019S EV-free medium did not support dendrite outgrowth, as evidenced by  
9 an average length of 48.7  $\mu\text{m}$ . The analysis of the distribution of dendrite lengths shows a  
10 greater proportion of short neurites (0-40  $\mu\text{m}$ ) in dopaminergic neurons exposed to basal  
11 medium or LRRK2 G2019S EV-free medium (Figure 9B). We conclude that WT but not LRRK2  
12 G2019S ACM mediates neuron growth.

13 To test the hypothesis that astrocytes shuttle trophic factors to neurons via EVs, we cultured  
14 dopaminergic neurons with basal medium, or with WT or LRRK2 G2019S EV-enriched fractions.  
15 WT EVs supported a 30 % increase in dendrite length compared to basal medium (Figure 9C),  
16 which is higher than the 18 % increase supported by WT soluble factors (Figure 9A).  
17 Interestingly, LRRK2 G2019S EVs were not as efficient as their WT counterparts, but they  
18 supported an 11 % increase in dendrite length (Figure 9C) and reduced the proportion of short  
19 neurites (0-40  $\mu\text{m}$ ) (Figure 9D). These results suggest that WT astrocytes secrete neurotrophic  
20 factors not only via direct release in the extracellular compartment, but also via production and  
21 release of EVs. Supplementation of the neuronal basal medium with WT or LRRK2 G2019S  
22 EVs resulted in neuron growth, but LRRK2 G2019S EVs provided only a marginal trophic  
23 support compared to WT EVs. Together with the previous observation that LRRK2 G2019S  
24 affects the biogenesis of EVs in astrocytes and the distribution of internalized EVs in neurons,  
25 these data support a model of astrocyte-to-neuron trophic support via EV-mediated shuttling of  
26 factors, and this system appears to be dysregulated in the LRRK2 G2019S model of PD.

27

## 28 Discussion

### 29 Dysregulation of iPSC-derived astrocyte-mediated EV biogenesis in Parkinson's 30 disease

31 Here we document the dysregulation of the MVB-mediated secretory pathway in human iPSC-  
32 derived astrocytes containing the PD-related mutation LRRK2 G2019S. Transcriptomic profiling  
33 revealed the misregulation of expression of exosome components in LRRK2 G2109S vs WT  
34 astrocytes (Figure 1). We found that genes involved in aspects of MVB trafficking and EV  
35 biogenesis, including *Rab27b*, were overexpressed in LRRK2 G2019S astrocytes (Figure 1E-F).  
36 Both LRRK2 G2019S MVBs and secreted EVs were smaller than their WT counterparts (Figure  
37 2 and 3E), and the mutant CD63<sup>+</sup> MVBs lost their perinuclear distribution (Figure 5). We did not  
38 observe a difference in the number of secreted CD63<sup>+</sup> EVs between WT and LRRK2 G2019S  
39 astrocytes (Figure 3C), suggesting that the secretion of at least one population of EVs is  
40 independent of the astrocyte genotype. However, we cannot rule out that sub-populations of  
41 CD63<sup>-</sup> EVs may be differentially secreted in mutant astrocytes.

1 Accumulating evidence supports a role for LRRK2 in vesicular membrane-related pathways,  
2 which could be mediated by the kinase activity of LRRK2 and the resulting phosphorylation of a  
3 subset of Rab GTPases (Alessi & Sammler, 2018; Steger et al., 2016). Rab GTPases are  
4 master regulators of vesicle biogenesis, and coordinate intracellular trafficking of vesicular  
5 organelles including autophagosomes, lysosomes and MVBs (Alessi & Sammler, 2018). The  
6 LRRK2 mutation G2019S results in a gain-of-function phenotype with increased kinase activity  
7 and increased phosphorylation of Rab substrates (Steger et al., 2016). Thus, the observation  
8 that the distribution and phenotype of MVBs and EVs is altered by LRRK2 G2019S (Figures 2  
9 and 3) may correlate with dysregulation of Rab GTPase signaling cascades. In fact, genetic  
10 manipulations of Rab27b in HeLa cells altered the size and distribution of CD63<sup>+</sup> MVBs, but did  
11 not change the size or protein content of the secreted EVs (Ostrowski et al., 2010). This  
12 suggests that while Rab27b may mediate LRRK2 G2019S-related alterations in MVB phenotype  
13 in astrocytes, it is likely that additional pathways are affected and alter EV morphology and  
14 cargo loading. For example, future studies could elucidate whether the increased kinase activity  
15 resulting from the LRRK2 G2019S mutation prevents EV maturation, as well as the rate of  
16 astrocyte-derived EV production and release.

17 We found that two important PD-related proteins, LRRK2 and  $\alpha$ Syn, were localized inside MVBs  
18 and secreted in astrocyte-derived EVs (Figure 4 and 6, Supplementary Figure 3). Furthermore,  
19 the LRRK2 G2019S mutation in astrocytes induced the accumulation of LRRK2 (Figure 4C-D)  
20 and p- $\alpha$ Syn (Figure 6A-B) within MVBs. We observed a trend towards greater levels of LRRK2  
21 in mutant EVs compared to WT, but no genotype-dependent changes in  $\alpha$ Syn levels  
22 (Supplementary Figure 3). However, the accumulation of p- $\alpha$ Syn in LRRK2 G2019S MVBs  
23 suggests that this aggregation-prone form of  $\alpha$ Syn may also accumulate in mutant EVs, and is  
24 consistent with studies showing that cerebral levels of p- $\alpha$ Syn are elevated in LRRK2 G2019S  
25 rodents (Longo et al., 2017). Furthermore, the LRRK2 mutation G2019S increases LRRK2  
26 autophosphorylation at serine 1292 (pS1292), and pS1292-LRRK2 was found in higher levels in  
27 EVs isolated from PD patients compared to healthy controls (Fraser, Moehle, Alcalay, West, &  
28 Consortium, 2016; Wang et al., 2017). Further studies are needed to determine if pS1292-  
29 LRRK2 and p- $\alpha$ Syn differentially accumulate in EVs secreted from LRRK2 G2019S vs WT  
30 astrocytes, as differences in EV profile between EV derived from healthy or PD astrocytes could  
31 open new avenues in the field of biomarker research. The investigation of biofluid-isolated EVs  
32 as non-invasive disease diagnostic tools in PD is an emerging field (Thompson et al., 2016),  
33 and the search for sensitive biomarkers is facing challenges. Many cell types, including cells of  
34 the CNS (Fiandaca, Kapogiannis et al., 2015, Shi, Liu et al., 2014) but also non-disease-  
35 relevant cell types, contribute to the pool of EVs isolated from biofluids. As a result, EV sub-  
36 populations that would best serve as markers of the disease are diluted in the total pool of EVs,  
37 which limits the sensitivity of a biomarker assay. Given the dysregulation of the EV secretory  
38 pathway in LRRK2 G2019S astrocytes, we speculate that astrocyte-derived EVs form a sub-  
39 population of interest that could provide a sensitive measure of disease progression. Astrocyte-  
40 derived exosomes could be isolated based on their expression of the Glial Fibrillary Acidic  
41 Protein (GFAP) or Glutamine Aspartate Transporter (GLAST) astrocyte markers (Venturini et  
42 al., 2019; Willis et al., 2017; Winston et al., 2019), and their cargoes compared between healthy  
43 donors and PD patients.

1

## 2 **Significance of EV trophic support in Parkinson's disease**

3 We also show that dopaminergic neurons internalize EVs secreted by WT or LRRK2 G2019S  
4 astrocytes (Figure 7). For this investigation, we focused our observations on a well-defined sub-  
5 population of EVs that can be genetically labeled with GFP, thus enabling the documentation of  
6 their internalization in live neurons. The EV genotype did not affect the amount of CD63-GFP  
7 exosomes taken up by dopaminergic neurons (Figure 7C), but LRRK2 G2019S exosomes  
8 accumulated to greater levels in the neurites compared to the somas (Figure 7E). Our  
9 observations suggest that the localization of internalized EVs can vary based on the genotype of  
10 the donor astrocyte. However, the functional consequences of EV localization in the recipient  
11 neurons are unclear. Studies found that the composition of EVs and the health status of donor  
12 and recipient cells can affect EV secretion and uptake (French, Antonyak, & Cerione, 2017),  
13 and could therefore alter astrocyte-to-neuron EV-mediated communication. Our study identified  
14 the PD-related proteins LRRK2 and  $\alpha$ Syn in EV-enriched fractions (Supplementary Figure 3),  
15 but their effect in the recipient neurons is unknown. Further studies including proteomics-based  
16 characterization of WT and LRRK2 G2019S astrocyte-derived EVs are needed to more  
17 thoroughly determine their composition, and which relevant cargoes (or lack of) affect the  
18 physiology of the recipient neurons.

19 In support of our observations suggesting the dysregulation of EV-related pathways in LRRK2  
20 G2019S astrocytes, we found that conditioned medium and EV-enriched fractions prepared  
21 from mutant astrocytes failed to provide neurotrophic support compared to WT astrocytes  
22 (Figures 8 and 9). We showed that in presence of LRRK2 G2019S ACM or EVs, dopaminergic  
23 neurons were not able to maintain their neurite length, as observed by a shortening of the  
24 neurites equivalent to that of neurons cultured in absence of trophic factors. However, we did  
25 not observe excessive neurite shortening ( $\leq 50$  % WT length) or fragmentation indicative of the  
26 presence of toxic factors (di Domenico et al., 2019; Liddelow et al., 2017). A previous study  
27 proposed a neurotoxic effect of LRRK2 G2019S astrocytes on dopaminergic neurons, possibly  
28 mediated by the transfer and accumulation of astrocytic  $\alpha$ Syn in neurons (di Domenico et al.,  
29 2019). While the proposed mechanisms of LRRK2 G2019S astrocyte-mediated effect on  
30 dopaminergic neurons appear to differ in the two studies, they are not mutually exclusive, and  
31 astrocytes could secrete neurotoxic molecules as well as fail to secrete EV-enclosed  
32 neurotrophic factors. In conclusion, our study suggests a novel effect of the PD-related mutation  
33 LRRK2 G2019S in astrocytes, and in their ability to support dopaminergic neurons. This study  
34 supports a model of astrocyte-to-neuron signaling and trophic support mediated by EVs, and  
35 dysregulation of this pathway contributes to LRRK2 G2019S astrocyte-mediated dopaminergic  
36 neuron atrophy.

37

38

## 1 Materials and Methods

### 2 Key resources table

| Reagent type (species) or resource | Designation                                                         | Source or reference      | Identifiers | Additional information                                                                                       |
|------------------------------------|---------------------------------------------------------------------|--------------------------|-------------|--------------------------------------------------------------------------------------------------------------|
| Antibody                           | Alexa Fluor-conjugated secondary antibodies                         | Thermo Fisher Scientific | Multiple    | IF 1:1000                                                                                                    |
| Antibody                           | anti-alpha-synuclein (rabbit monoclonal)                            | Abcam                    | ab138501    | IF 1:200                                                                                                     |
| Antibody                           | anti-APC magnetic beads                                             | Miltenyi                 | 130-090-855 | MACS 1:5                                                                                                     |
| Antibody                           | anti-CD133, APC-conjugated (mouse monoclonal)                       | BD Biosciences           | 566596      | MACS 1:20                                                                                                    |
| Antibody                           | anti-CD44 (rat monoclonal)                                          | BD Biosciences           | 550538      | IF 1:500                                                                                                     |
| Antibody                           | anti-CD63 (mouse monoclonal)                                        | Thermo Fisher Scientific | MA1-19281   | IF 1:500. IEM: 1:40                                                                                          |
| Antibody                           | anti-GFAP (mouse monoclonal)                                        | BD Biosciences           | 556328      | IF 1:500                                                                                                     |
| Antibody                           | anti-LRRK2 (rabbit monoclonal)                                      | Abcam                    | ab133474    | IF 1:200. IEM 1:20                                                                                           |
| Antibody                           | anti-MAP2 (chicken polyclonal)                                      | Thermo Fisher Scientific | PA1-10005   | IF 1:3000                                                                                                    |
| Antibody                           | anti-mouse IgG conjugated to 12-nm gold particles (goat polyclonal) | Jackson ImmunoResearch   | 115-205-146 | IEM 1:20                                                                                                     |
| Antibody                           | anti-mouse IgG conjugated to 6-nm gold particles (goat polyclonal)  | Jackson ImmunoResearch   | 115-195-146 | IEM 1:40                                                                                                     |
| Antibody                           | anti-phospho alpha-synuclein (S129) (rabbit monoclonal)             | Abcam                    | ab51253     | IEM 1:20                                                                                                     |
| Antibody                           | anti-rabbit IgG conjugated to 6-nm gold particles (goat polyclonal) | Jackson ImmunoResearch   | 111-195-144 | IEM 1:40                                                                                                     |
| Antibody                           | anti-TH (rabbit polyclonal)                                         | PhosphoSolutions         | 2025-THRAB  | IF 1:500                                                                                                     |
| Antibody                           | anti-vimentin (rat monoclonal)                                      | R&D                      | MAB2105     | IF 1:100                                                                                                     |
| Cell line ( <i>Homo sapiens</i> )  | Human midbrain astrocytes                                           | ScienCell                | 1850        |                                                                                                              |
| Cell line ( <i>Homo sapiens</i> )  | Isogenic control iPSCs                                              | (Reinhardt et al., 2013) | IM2-GC      | Prof. Dr. Thomas Gasser (Universitätsklinikum Tübingen) and Prof. Dr. Hans R. Schöler (Max-Planck Institute) |
| Cell line ( <i>Homo sapiens</i> )  | LRRK2 G2019S iPSCs                                                  | (Reinhardt et al., 2013) | IM2         | Prof. Dr. Thomas Gasser (Universitätsklinikum Tübingen) and Prof. Dr. Hans R. Schöler (Max-Planck Institute) |

|                              |                                                  |                          |                   |  |
|------------------------------|--------------------------------------------------|--------------------------|-------------------|--|
| Chemical compound, drug      | Ascorbic acid                                    | Sigma                    | A92902            |  |
| Chemical compound, drug      | CHIR99021                                        | Stemcell Technologies    | 72054             |  |
| Chemical compound, drug      | Cytosine $\beta$ -D-arabinofuranoside (AraC)     | Sigma                    | C1768             |  |
| Chemical compound, drug      | DAPT                                             | Tocris Bioscience        | 2634              |  |
| Chemical compound, drug      | dibutyryl cAMP                                   | Millipore Sigma          | 28745             |  |
| Chemical compound, drug      | LDN193189 hydrochloride                          | Sigma                    | SML0559           |  |
| Chemical compound, drug      | Purmorphamine                                    | Millipore Sigma          | 540223            |  |
| Chemical compound, drug      | ROCK inhibitor (Y-27632)                         | Stemcell Technologies    | 72304             |  |
| Chemical compound, drug      | SB431542                                         | Stemcell Technologies    | 72234             |  |
| Commercial assay or kit      | Control library phiX                             | Illumina                 | FC-110-3001       |  |
| Commercial assay or kit      | ExoELISA-ULTRA Complete Kit (CD63 Detection)     | System biosciences       | EXEL-ULTRA-CD63-1 |  |
| Commercial assay or kit      | KAPA library quantification kit                  | Roche                    | 7960298001        |  |
| Commercial assay or kit      | KAPA SYBR FAST qPCR kit                          | Roche                    | 7959397001        |  |
| Commercial assay or kit      | Nextera XT DNA library preparation kit           | Illumina                 | FC-131-1024       |  |
| Commercial assay or kit      | RevertAid First Strand cDNA Synthesis Kit        | Thermo Fisher Scientific | K1622             |  |
| Commercial assay or kit      | RNA purification kit                             | Qiagen                   | 74104             |  |
| Commercial assay or kit      | Taqman LRRK2 SNP genotyping assay                | Thermo Fisher Scientific | 4351379           |  |
| Other                        | 96-well plates with optically clear bottom       | Ibidi                    | 89626             |  |
| Other                        | LD columns                                       | Miltenyi Biotech         | 130-042-901       |  |
| Other                        | Polycarbonate aluminum bottles with cap assembly | Beckman Coulter          | 355618            |  |
| Other                        | Prolong Diamond with DAPI                        | Thermo Fisher Scientific | P36962            |  |
| Peptide, recombinant protein | BDNF (recombinant human)                         | PeproTech                | 450-02            |  |
| Peptide, recombinant protein | EGF (recombinant human )                         | Thermo Fisher Scientific | PHG0311           |  |
| Peptide, recombinant protein | FGF basic (146 aa) (recombinant human )          | R&D Systems              | 233-FB-025        |  |



|                              |                                                                              |                                     |                                                                                                                                                             |                                                           |
|------------------------------|------------------------------------------------------------------------------|-------------------------------------|-------------------------------------------------------------------------------------------------------------------------------------------------------------|-----------------------------------------------------------|
| Peptide, recombinant protein | GDNF (recombinant human)                                                     | PeproTech                           | 450-10                                                                                                                                                      |                                                           |
| Peptide, recombinant protein | SHH(C25II) (recombinant mouse)                                               | R&D Systems                         | 464-SH-200                                                                                                                                                  |                                                           |
| Peptide, recombinant protein | TGF- $\beta$ 3 (recombinant human)                                           | R&D Systems                         | 8420-B3-025                                                                                                                                                 |                                                           |
| Recombinant DNA reagent      | pCT-CD63-GFP                                                                 | System Biosciences                  | CYTO120-PA-1                                                                                                                                                |                                                           |
| Sequence-based reagent       | Human CD82_F                                                                 | This paper                          | qPCR primer                                                                                                                                                 | <sup>5</sup> GGTTTCGT<br>GGAAGGAAG<br>C <sup>3</sup>      |
| Sequence-based reagent       | Human CD82_R                                                                 | This paper                          | qPCR primer                                                                                                                                                 | <sup>5</sup> AAGATCAA<br>GTTGAAGAG<br>GAAGAG <sup>3</sup> |
| Sequence-based reagent       | Human Rab27b_F                                                               | This paper                          | qPCR primer                                                                                                                                                 | <sup>5</sup> AACTGGAT<br>GAGCCTCACT<br>G <sup>3</sup>     |
| Sequence-based reagent       | Human Rab27b_R                                                               | This paper                          | qPCR primer                                                                                                                                                 | <sup>5</sup> CTTGCCGT<br>TCATTGACT<br>TC <sup>3</sup>     |
| Software, algorithm          | Beacon Designer Lite 8.16                                                    | Premier Biosoft (San Francisco, CA) | N/A                                                                                                                                                         |                                                           |
| Software, algorithm          | Database for Annotation, Visualization and Integrated Discovery (DAVID) v6.8 | N/A                                 | <a href="https://david.ncicrf.gov">https://david.ncicrf.gov</a>                                                                                             |                                                           |
| Software, algorithm          | EBseq v3.8                                                                   | (Leng et al., 2013)                 | <a href="http://www.bioconductor.org/packages/devel/bioc/html/EBSeq.html">http://www.bioconductor.org/packages/devel/bioc/html/EBSeq.html</a>               |                                                           |
| Software, algorithm          | ComplexHeatmap v3.11                                                         | (Z. Gu, Eils, & Schlesner, 2016)    | <a href="http://bioconductor.org/packages/release/bioc/html/ComplexHeatmap.html">http://bioconductor.org/packages/release/bioc/html/ComplexHeatmap.html</a> |                                                           |
| Software, algorithm          | Imaris 9.3                                                                   | Bitplane (Belfast, UK)              | N/A                                                                                                                                                         |                                                           |
| Software, algorithm          | STAR v.2.7.3a                                                                | (Dobin et al., 2013)                | <a href="https://github.com/alexdobin/STAR/releases">https://github.com/alexdobin/STAR/releases</a>                                                         |                                                           |
| Software, algorithm          | Starcode v1.1                                                                | (Zorita, Cusco, & Filion, 2015)     | <a href="https://github.com/gui11aume/starcode">https://github.com/gui11aume/starcode</a>                                                                   |                                                           |

1

## 2 **Culture of iPSCs**

3 Patient-derived iPSCs with the LRRK2 mutation G2019S and the corresponding isogenic control  
4 were provided by Prof. Dr. Thomas Gasser (Universitätsklinikum Tübingen) and Prof. Dr. Hans  
5 R. Schöler (Max-Planck Institute). The cells were genotyped to confirm the presence of the  
6 LRRK2 mutation G2019S using a TaqMan SNP genotyping assay (Thermo Fisher Scientific,  
7 Waltham, MA), and karyotyped every 2 months to confirm genomic stability (Cell Line Genetics,  
8 Madison, WI). The iPSCs were cultured in mTesR1 or mTesR Plus medium (StemCell  
9 Technologies, Vancouver, Canada), regularly passaged as aggregates using ReLeSR  
10 (StemCell Technologies), and cultured on Geltrex-coated plates (Thermo Fisher Scientific).

11

## 1 ***Preparation and culture of iPSC-derived NPCs, dopaminergic neurons and astrocytes***

2 The step-by-step protocols, media recipes and quality control experiments to prepare iPSC-  
3 derived NPCs, dopaminergic neurons and astrocytes have been described in extensive detail  
4 (de Rus Jacquet, 2019). Briefly, iPSCs were plated at a density of  $1.6 \times 10^6$  cells/well of a  
5 Geltrex-coated 6-well plate, and neuralized by dual SMAD inhibition (Kriks et al., 2011): day 0  
6 (100 nM LDN193189, 10  $\mu$ M SB431542), day 1 and 2 (100 nM LDN193189, 10  $\mu$ M SB431542,  
7 SHH 100 ng/mL, purmorphamine 2  $\mu$ M), day 3 and 5 (100 nM LDN193189, 10  $\mu$ M SB431542,  
8 100 ng/mL SHH, 2  $\mu$ M purmorphamine, 3  $\mu$ M CHIR99021), day 7 and 9 (100 nM LDN193189, 3  
9  $\mu$ M CHIR99021). At day 11, the cells were harvested and replated at  $7 \times 10^6$  cells/well on a  
10 Geltrex-coated 6-well plate. At day 11 and day 12, the medium was supplemented with 3  $\mu$ M  
11 CHIR99021, 20 ng/mL FGF2 and 20 ng/mL EGF. At day 13, the differentiation of the iPSCs into  
12 midbrain floor-plate NPCs was complete, and the cells were maintained in NPC medium  
13 (NB/B27, 20 ng/mL FGF2 and 20 ng/mL EGF) supplemented with ROCK inhibitor (Y-27632,  
14 Stemcell Technologies) at each single-cell passage.

15 To prepare dopaminergic neurons, NPCs were harvested in Accumax cell dissociation solution  
16 (Innovative Cell Technologies, San Diego, CA) and plated at  $7 \times 10^6$  cells/well on a Geltrex-  
17 coated 6-well plate. The next day, NPCs were washed with DPBS and incubated in neuron  
18 differentiation medium (NB/B27, 0.5 mM dibutyryl cAMP, 10  $\mu$ M DAPT, 0.2 mM ascorbic acid,  
19 20 ng/mL BDNF, 20 ng/mL GDNF, 1 ng/mL TGF- $\beta$ 3) (Kriks et al., 2011). Neuron differentiation  
20 medium was replaced every 2 days for a total of 7 to 10 days. The resulting culture consisted of  
21 neurons and undifferentiated NPCs. To isolate a pure neuronal population, the cells were  
22 harvested in Accumax medium, diluted to a density of  $1 \times 10^6$  cells in 100  $\mu$ l MACS buffer  
23 (HBSS, 1 % v/v sodium pyruvate, 1 % GlutaMAX, 100 U/ml penicillin/streptomycin, 1 % HEPES,  
24 0.5 % bovine serum albumin) supplemented with CD133 antibody (5 % v/v, BD Biosciences,  
25 San Jose, CA, cat. # 566596), and the CD133<sup>+</sup> NPCs were depleted by magnetic-activated cell  
26 sorting (MACS) using an LD depletion column (Miltenyi Biotech, San Diego, CA), as described  
27 previously (de Rus Jacquet, 2019).

28 To prepare astrocytes, NPCs were plated on Geltrex-coated plates at 15,000 cells/cm<sup>2</sup> in  
29 ScienCell astrocyte medium (ScienCell Research Laboratories, Carlsbad, CA), passaged every  
30 7 days at 15,000 cells/cm<sup>2</sup>, and cryopreserved after 28 days of differentiation or used for  
31 experiments (de Rus Jacquet, 2019; Tcw et al., 2017).

32

## 33 ***Culture of primary human astrocytes***

34 Fetal human midbrain astrocytes were obtained from ScienCell Research Laboratories. To  
35 match the gender of the iPSCs used in this study, the primary astrocytes were selected from a  
36 female donor. The cells were cultured in Astrocyte Medium (ScienCell Research Laboratories),  
37 plated at a density of 40,000 cells/cm<sup>2</sup>, cultured for 48 h, and harvested in TRIzol for RNA-seq  
38 analysis.

39

40

## 1 ***Isolation of extracellular vesicles and preparation of EV-free ACM***

2 EVs were isolated from ACM by ultracentrifugation following an established protocol  
3 (Purushothaman, 2019). Astrocytes were plated in ScienCell astrocyte medium, at a density of  
4 40,000 cells/cm<sup>2</sup> in 15 cm dishes (5 to 8 dishes depending on the number of astrocytes  
5 available), and grown to confluence for 24 h. The cells were subsequently triple washed with  
6 PBS to remove cell debris and traces of FBS, and 25 mL of NB/B27 medium was added to each  
7 15 cm dish. The ACM was collected twice, at 48 h intervals, and processed for EV isolation at  
8 4°C. First, large debris was removed by serial centrifugation steps in a Sorvall ST8R centrifuge  
9 (Thermo Fisher Scientific) at 300 x g for 10 min and at 2,000 x g for 20 min, followed by 12,000  
10 rpm for 30 min using a fixed angle type 70 Ti rotor (Beckman Coulter, Brea, CA) and  
11 polycarbonate aluminum bottles with cap assembly (Beckman Coulter). The cleared  
12 supernatant was subsequently centrifuged at 40,000 rpm for 70 min to pellet the EVs using the  
13 type 70 Ti rotor in an Optima XPN-80 ultracentrifuge (Beckman Coulter). The supernatant  
14 resulting from this high-speed centrifugation is the EV-free ACM, and it was filtered through a  
15 0.22 µm membrane and stored at -80°C. The EV pellet was resuspended in PBS and  
16 centrifuged at 40,000 rpm for 70 min using the type 70 Ti rotor in an Optima XPN-80  
17 ultracentrifuge (Beckman Coulter). The pellet obtained after this last centrifugation step was the  
18 purified EV fraction, which was resuspended in PBS and processed immediately for cryo-EM or  
19 aliquoted and stored at -80°C. The number of EVs collected in the EV-enriched fractions were  
20 estimated by ELISA (System Biosciences). The ELISA standards provided in the kit are  
21 calibrated by nanoparticle tracking analysis to measure the number of exosomes and establish  
22 a standard curve based on exosome abundance, and therefore enable an estimation of the  
23 number of exosomes in the experimental sample (Figure 3C).

24

## 25 ***Cryo-electron microscopy***

26 Cryo grids were prepared using two types of TEM grids: 400 mesh Quantifoil R1.2/1.3 grids with  
27 empty holes and 400 mesh Quantifoil R1.2/1.3 grids coated with a 2 nm thin carbon layer  
28 (Quantifoil Micro Tools GmbH, Germany). The grids were rendered hydrophilic by glow  
29 discharge using a Pelco easiGlow glow discharger (Ted Pella Inc., CA) for 60 seconds, with a  
30 current of 15 mA and a vacuum of 0.39 mbar. The cryo grids were then prepared using a Mark  
31 IV Vitrobot (FEI Company, OR) with the operation chamber cooled to 4°C at a set humidity level  
32 of 100 %. A total of 3 µl of fresh EVs was applied to a glow discharged grid. The grid was  
33 subsequently blotted for 3 seconds from both sides with blot force 3, and plunged into a liquid  
34 ethane bath for vitrification.

35 The cryo grids were loaded into a Tecnai F20 transmission electron microscope (FEI Company,  
36 OR) for imaging through a side entry Gatan 626 cryo holder (Gatan Inc., CA). The microscope  
37 was operated at 200 kV and was equipped with a standard Field Emission Gun (s-FEG) and a  
38 Gatan K2 Summit direct electron detector (Gatan Inc., CA). Data collection was carried out  
39 using the automation software package SerialEM (University of Colorado). To identify the  
40 localization of the EVs on the grid, survey maps were first taken for various grid squares at a  
41 nominal magnification of 1700x, with a calibrated pixel size of 2.15 nm (corresponding to a

1 calibrated magnification of 2325.6x). Once the EVs were identified on the survey maps, high  
2 magnification images were taken at a nominal magnification of 29000x with a pixel size of 0.15  
3 nm (corresponding to a calibrated magnification of 33333x). The illumination was set to produce  
4 a dose rate of 10.5 electrons per pixel per second, and the K2 camera was operated in counted  
5 mode with dose fractionation of 8 seconds total exposure time for 40 frames (0.2 seconds per  
6 frame). Frames were aligned for motion correction using the default algorithm in SerialEM.

7

## 8 ***Transmission electron microscopy***

9 WT and LRRK2 G2019S astrocytes were cultured in 60 mm dishes to 80% confluence and  
10 immersion fixed in freshly prepared 2% (w/v) paraformaldehyde (Sigma-Aldrich) and 2%  
11 glutaraldehyde (Electron Microscopy Sciences, Hatfield, PA) in Hanks' balanced salt solution  
12 (20 mM HEPES, pH 7.4) for 2 h at room temperature. To facilitate handling, cells were pelleted  
13 and resuspended in 2 % (w/v) agar as described before (Paez-Segala et al., 2015). Cell pellets  
14 were then post-fixed in 1% osmium tetroxide (Electron Microscopy Sciences, Hatfield, PA) for 1  
15 h at room temperature, dehydrated in graded ethanol solutions (30%, 50%, 70%, 80%, 95%,  
16 and 100%), and embedded in Eponate-12 (Ted Pella, Redding, CA). Ultrathin sections (60 nm)  
17 were cut using a Leica UC6 ultramicrotomes, placed on Formvar/carbon-coated copper grids,  
18 and stained with 3% aqueous uranyl acetate (15 minutes) and Sato's lead solution (5 minutes).  
19 Sections were imaged using a FEI Spirit BioTWIN transmission electron microscope operating  
20 at 80 kV, equipped with a 4k x 4k Gatan OneView Camera.

21

## 22 ***Immunogold electron microscopy***

23 Cultured astrocytes were fixed in 4% paraformaldehyde and 0.2% glutaraldehyde in Hanks'  
24 balanced salt solution (20 mM HEPES, pH 7.4) for 2 h at room temperature. After pelleting,  
25 samples were transferred to carriers filled with 20% BSA and frozen in a HPF Compact 01 high  
26 pressure-freezing machine (M. Wohlwend GmbH, Sennwald, Switzerland) for cryo-  
27 immobilization. Samples were freeze substituted in acetone containing 0.1% uranyl acetate plus  
28 3% distilled water in a freeze substitution unit (Leica EM AFS2, Leica Microsystems, Buffalo  
29 Grove, IL) at  $-90^{\circ}\text{C}$  for 20 hours. Afterwards, the temperature was brought up slowly to  $-45^{\circ}\text{C}$ ;  
30 samples were rinsed with pure acetone, and infiltrated with 30%, 50%, and 70% Lowicryl HM20  
31 resin (Polysciences Inc., Warrington, PA) in acetone for 2 h each followed by 100% HM20 resin  
32 overnight. Samples were embedded in Lowicryl HM20 and UV polymerized for 2 days at  $-45^{\circ}\text{C}$   
33 and 2 days at  $20^{\circ}\text{C}$ . Postembedding immunogold labeling was performed on ultrathin HM20  
34 sections (70 nm) of astrocytes to detect CD63. The ultrathin sections were conditioned in  
35 blocking buffer containing 1% BSA (w/v, Sigma-Aldrich), 0.01% (v/v) Triton X-100, and 0.01%  
36 (v/v) Tween 20 in PBS for 20 min at room temperature, and incubated overnight at  $4^{\circ}\text{C}$  with an  
37 anti-CD63 primary antibody (1:20 dilution, Thermo Fisher Scientific, cat. # MA1-19281) in  
38 blocking buffer. After extensive rinses in PBS, sections were incubated for 2 h at room  
39 temperature with a secondary antibody conjugated to 6-nm gold particles (Jackson  
40 ImmunoResearch, cat # 115-195-146) diluted to 1:40 in blocking buffer. Samples were rinsed in  
41 PBS, and then fixed with 1% (v/v) glutaraldehyde in PBS for 10 min. Gold particles were

1 amplified with silver enhancement (HQ silver kit from Nanoprobes, Yaphank, NY) for 4 min at  
2 room temperature and contrast stained with 3% UA and Sato's triple lead.

3 For double-labeling experiments, cultured cells were fixed in 4% paraformaldehyde and 0.2%  
4 glutaraldehyde in Hanks' balanced salt solution (20 mM HEPES, pH 7.4) for 2 h at room  
5 temperature, pelleted in 2% (w/v) agar, cut into small blocks, and infused in 2 M sucrose  
6 containing 15% (w/v) polyvinylpyrrolidone (10 kDa) for freezing. Samples were frozen and  
7 ultrathin sections were prepared using a Leica UC6 ultramicrotome equipped with a Leica EM  
8 FC6 cryochamber. The cryo-sections were lifted onto nickel grids and stored overnight on  
9 gelatin at 4°C. Before immunolabeling, the gelatin was liquefied at 37°C, and the sections were  
10 washed by floating the sections on droplets of PBS. For immunogold localization, the grids with  
11 the attached thin sections were conditioned on droplets containing 1% (w/v) BSA, 0.01% (v/v)  
12 Triton X-100, and 0.01% (v/v) Tween 20 in PBS (blocking buffer) for 10 min at room  
13 temperature. Grids were incubated for 2 h in the presence of anti-LRRK2 (1:20 dilution, Abcam,  
14 cat. # ab133474) and anti-CD63 antibodies (1:40 dilution), or anti-p- $\alpha$ Syn antibody (1:20  
15 dilution, Abcam, cat. # ab51253) with mouse monoclonal anti-CD63 (1:40 dilution) in blocking  
16 buffer. After extensive rinses in PBS, the sections were incubated for 1 h at 35°C with a  
17 secondary antibody conjugated to 6-nm gold particles (1:40 dilution, Jackson ImmunoResearch,  
18 cat # 111-195-144) and a secondary antibody conjugated to 12-nm gold particles (1:20 dilution,  
19 Jackson ImmunoResearch, cat # 115-205-146) in blocking buffer. Lastly, grids with the attached  
20 thin sections were rinsed in PBS, fixed with 2% (v/v) glutaraldehyde in PBS for 10 min, and  
21 negative or positive contrast stained. Electron micrographs were taken with a FEI Spirit  
22 BioTWIN transmission electron microscope operating at 80 kV, equipped with a 4k x 4k Gatan  
23 OneView camera.

24

## 25 ***Immunofluorescence***

26 Cells were grown on German glass coverslips (Electron Microscopy Sciences) or 96-well plates  
27 with an optically clear bottom (Ibidi, Gräfelfing, Germany) coated with Geltrex. The cells were  
28 washed once with PBS and fixed by adding 4 % paraformaldehyde (Fisher Scientific, Waltham,  
29 MA) for 20 minutes at room temperature. The cells were subsequently washed once with PBS,  
30 and blocked/permeabilized in blocking buffer (0.3 % TX-100, 1 % BSA, 10 % FBS in PBS) for  
31 one hour at room temperature. The cells were then washed once with PBS and incubated in  
32 primary antibody overnight at 4°C with the following antibodies: anti-MAP2 (1:3000, Thermo  
33 Fisher Scientific cat. # PA1-10005), TH (1:500, PhosphoSolutions, Aurora, CO, cat. # 2025-  
34 THRAB), anti-CD63 (1:500, Thermo fisher Scientific cat. # MA1-19281), anti-LRRK2 (1:200,  
35 Abcam cat. # ab133474), anti-GFAP (1:500, BD Biosciences, cat. # 556328), anti-vimentin  
36 (1:100, R&D, Minneapolis, MN, cat. # MAB2105), and anti-CD44 (1:500, BD Biosciences, cat. #  
37 550538) in BSA buffer (1 % BSA in PBS). The next day, the cells were washed twice with  
38 DPBS, then incubated in Alexa-conjugated secondary antibodies (Thermo Fisher Scientific)  
39 diluted 1:1000 in BSA buffer for 1 hour at room temperature. The cells were washed three times  
40 with DPBS, then coverslips were mounted on slides with ProLong Diamond with DAPI (Thermo  
41 Fisher Scientific) and cured for 24 h in the dark at room temperature.



1

## 2 **RNA isolation and RT-qPCR**

3 Confluent cell monolayers grown into individual wells of a Geltrex-coated 6-well plate were first  
4 washed with DPBS to remove the cell culture medium and cell debris, then homogenized in  
5 TRIzol (Thermo Fisher Scientific), and processed immediately or stored at -80°C. Chloroform  
6 (20 % v/v) was added to the TRIzol samples, which were shaken vigorously for 20 seconds and  
7 allowed to sit at room temperature for 3 min. The samples were subsequently centrifuged at  
8 12,000 x g for 15 min, at 4°C, to separate the aqueous solution from the organic phase. The top,  
9 aqueous phase was collected, and mixed 1:1 with ethanol. The RNA-containing samples were  
10 processed using an RNeasy kit (Qiagen, Hilden, Germany, cat. #74104) following the  
11 manufacturer's instructions, and the isolated RNA was processed immediately or stored at -  
12 80°C. cDNA synthesis was carried out with a RevertAid First Strand cDNA Synthesis Kit  
13 (Thermo Fisher Scientific) as described in the manufacturer's instructions. Forward and reverse  
14 primers for RT-qPCR were designed at exon-exon junctions, using Beacon Designer Lite 8.16  
15 (Premier Biosoft, San Francisco, CA). The primer sequences were as follows:

16 Human Rab27b: 5'AACTGGATGAGCCAAGT<sup>3'</sup> (forward) and 5'CTTGCCGTTTCATTGACTTC<sup>3'</sup>  
17 (reverse)  
18 Human CD82: 5'GGTTTCGTGGAAGGAAGC<sup>3'</sup> (forward) and  
19 5'AAGATCAAGTTGAAGAGGAAGAG<sup>3'</sup> (reverse).

20 Each RT-qPCR measurement was performed in technical duplicates, with a total of four  
21 independent biological replicates. Relative mRNA levels were calculated for each gene using  
22 the formula:

$$23 \quad 2^{-\Delta\Delta Ct} = 2^{-\{(Ct, TG - Ct, \beta actin)_{LRRK2 G2019S} - (Ct, TG - Ct, \beta actin)_{WT}\}}$$

23

24 where "Ct, TG" represents the cycle threshold (Ct) for the target gene (TG), and "Ct,  $\beta$ actin"  
25 represents the cycle threshold for the loading reference *Actb* ( $\beta$ -actin). The KAPA SYBR FAST  
26 qPCR (Roche, Basel, Switzerland) master mix was used to prepare the reactions, and RT-  
27 qPCR was performed using a Roche LightCycler 480.

28

## 29 **RNA-sequencing and analysis**

30 Samples were homogenized in TRIzol, then total RNA was isolated according to the  
31 manufacturer's instructions, quantified by Nanodrop (Thermo Fisher Scientific), and diluted to 1  
32 ng/ $\mu$ l in nuclease-free water. A total of 1 ng of RNA was added to 2.5  $\mu$ l of cell lysis buffer  
33 (nuclease-free water with 0.2 % v/v Triton X-100 and 0.1 U/ $\mu$ l RNase inhibitor), and subjected to  
34 cDNA synthesis and amplification as described before (Cembrowski et al., 2018). Libraries were  
35 prepared using a modified Nextera XT DNA protocol (Illumina, San Diego, CA) where 5  $\mu$ M  
36 P5NEXTPT5 was substituted for the i5 primers in the kit. Libraries were quantified by qPCR  
37 (Roche), normalized to 2 nM, then pooled and sequenced on a NextSeq550 flowcell with 25

1 bases in read 1, 8 bases in the i7 index read, and 50 bases in read 2. The control library phiX  
2 (Illumina) was spiked in at a final concentration of 15% to improve color balance in read 1.

3

#### 4 *Smrtscrb2 analysis pipeline.*

5 Custom python scripts were used to extract Barcode and UMI sequences from read 1. The  
6 correction of barcode error was achieved using starcode v1.1 (Zorita et al., 2015) with the  
7 following additional parameters: “-d 1 -q --print\_clusters”. Read 2 sequences were renamed  
8 using the error-corrected barcode from starcode and UMI sequences from read 1, and were  
9 aligned to the Homo sapiens GRCh38.p12 genome assembly and annotation from Ensembl  
10 (ensembl.org) using STAR (Dobin et al., 2013) with the following additional parameters: “--  
11 alignIntronMax 200000 --outSAMattributes All --outSAMunmapped Within --outSAMtype BAM  
12 Unsorted”. The validity of an alignment was defined by the unique alignment to an exon feature  
13 on the correct strand. Gene-level counts were created using valid alignments with at least 50%  
14 of the read aligned to an exon feature, using a custom python script to collapse UMIs by gene.  
15 All custom scripts are available by request.

16 Differential gene expression analysis was performed using EBseq v3.8 in R (Leng et al., 2013),  
17 with condition 1 being LRRK2 G2019S and condition 2 being WT. EBseq calculated a median  
18 normalization of the sequencing counts using the median of ratios methods (Anders & Huber,  
19 2010). First, the geometric mean of the sequencing counts was calculated for each gene and  
20 across all samples to create a pseudo-reference sample, and the ratio of the sequencing counts  
21 to the pseudo-reference counts was calculated for every gene. Then, for each sample, the  
22 median value of all the ratios was taken as the normalization factor. Finally, the median  
23 normalized sequencing counts were calculated by dividing the sample’s sequencing counts by  
24 the sample’s normalization factor. A false discovery rate of 0.05 and a fold change threshold of  
25 1.4 or 0.7 were used to identify dysregulated genes in LRRK2 G2019S vs WT astrocytes. A k-  
26 means clustering algorithm (k=3) was used to group genes into low, moderate and highly  
27 expressed transcripts based on their  $\log_{10}(1+\text{median normalized counts})$  value, using  
28 ComplexHeatmap v3.11 in R (Z. Gu et al., 2016). Gene ontology enrichment analysis was done  
29 using the Database for Annotation, Visualization, and Integrated Discovery (DAVID v6.8,  
30 <https://david.ncifcrf.gov/>) (Huang da, Sherman, & Lempicki, 2009a, 2009b). A list of all genes  
31 detected in all the samples was exported for use as the background gene set in DAVID.

32

#### 33 ***Accession numbers***

34 Raw RNA-seq datasets have been deposited in the GEO data repository (NCBI), accession  
35 number GSE152768.

36

#### 37 ***Internalization of CD63<sup>+</sup> exosomes by dopaminergic neurons***

38 The study of the internalization of astrocyte-derived EVs by dopaminergic neurons followed a  
39 specific multi-step protocol that is detailed below: (1) prepare separate cultures of dopaminergic

1 neurons and astrocytes, (2) transduce each cell type to express a protein of interest (tdTomato  
2 or CD63-GFP), (3) harvest the astrocytes and plate them directly on the neurons, and (4)  
3 monitor the internalization of EVs by live cell microscopy. As a first step to this protocol,  
4 astrocytes were plated at 40,000 cells/cm<sup>2</sup> in ScienCell astrocyte medium, and transduced the  
5 next day with a lentivirus expressing CD63-GFP (produced from pCT-CD63-GFP, System  
6 Biosciences, Palo Alto, CA). The astrocytes expressed GFP between 48 and 72 h after  
7 transduction. In parallel, iPSC-derived dopaminergic neurons were plated at 70,000 cells/well in  
8 a Geltrex-coated 96-well optically clear plate (Ibidi) in neuron differentiation medium. After 2 to 3  
9 days in culture, the dopaminergic neurons were transduced with an adeno-associated virus rh10  
10 vector expressing CAG-tdTomato. After 72 h, the rh10-CAG-tdTomato-containing medium was  
11 removed, and 20,000 CD63-GFP astrocytes were plated in each neuron-containing well of the  
12 96-well plate, on top of the tdTomato dopaminergic neurons. To ensure a healthy co-culture, the  
13 cells were maintained in NB/B27 with 0.5 % FBS. At the time of imaging, the cell culture  
14 medium was changed to pre-warmed phenol red-free medium to reduce nonspecific  
15 background fluorescence. The uptake of astrocyte-secreted CD63-GFP EVs by dopaminergic  
16 neurons was monitored by live-cell confocal microscopy, using a temperature and CO<sub>2</sub>-  
17 controlled incubation chamber mounted on a Zeiss LSM 880 inverted laser scanning confocal  
18 microscope.

19

## 20 ***Confocal and widefield microscopy***

21 The following microscopes were used: (1) Zeiss LSM 880 inverted laser scanning confocal  
22 microscope equipped with a plan-apochromatic 63x oil objective lens (Zeiss, NA = 1.4), 40x oil  
23 objective lens (Zeiss, NA = 1.3), 405 nm, 488 nm and 561 nm laser lines, and ZEN software  
24 (Zeiss, Oberkochen, Germany). (2) Nikon Eclipse TiE inverted microscope equipped with a CFI  
25 Plan Apo Lambda 10x (Nikon Instruments, NA = 0.45) and a CFI Plan Apo VC 60x oil objective  
26 lens (Nikon Instruments, NA = 1.4), sCMOS camera (Zyla 4.2, Andor), SPECTRA X light engine  
27 illumination source (Lumencor, Beaverton, OR), and NIS-Elements software (Nikon Instruments,  
28 Tokyo, Japan). The experimental details for each imaging experiment are provided in the  
29 appropriate subsection in Materials and Methods.

30

## 31 ***Image analysis***

32 *CD63<sup>+</sup> marker distribution in astrocytes.* Images in Zeiss CZI file format were properly converted  
33 to Imaris native IMS file format, and analyzed in Imaris 9.3 (Bitplane, Belfast, UK). Each image  
34 was composed of three channels representing the CD44 membrane marker, CD63  
35 exosome/MVB marker, and DAPI nuclear marker. The components in each fluorescence  
36 channel were detected using the cell creation wizard without the need for additional image  
37 preprocessing. Intensity thresholds were calculated for each channel such that the values were  
38 applied to all datasets since they were acquired using identical acquisition settings to minimize  
39 user bias; however, for cases in which the cytoplasmic staining was heterogeneous, the  
40 intensity thresholds were manually adjusted. For nucleus detection, a size filter was used to  
41 remove small and irregular shapes. For cell detection, a surface was generated by expanding it

1 on a single nucleus accompanied by a size filter. For vesicle detection, CD63<sup>+</sup> structures were  
2 modeled as spots with an estimated diameter of 0.8  $\mu\text{m}$  with region growing disabled. Statistics  
3 were exported for each cell object, and “Vesicles Distance to Closest Nucleus” statistics were  
4 used to analyze CD63<sup>+</sup> MVB distribution in astrocytes.

5 *Colocalization of LRRK2 and CD63.* Images in Zeiss CZI file format were properly converted to  
6 Imaris native IMS file format, and analyzed in Imaris 9.3. All fluorescence channels were first  
7 deconvolved using the “robust” algorithm (15 iterations) in Imaris ClearView which estimated the  
8 PSF based on a widefield fluorescence template and the acquisition parameters used. A  
9 surface object was created for the CD63 (exosome/MVB) channel with background subtraction  
10 enabled (Gaussian filter width of 1  $\mu\text{m}$ ). LRRK2 was detected as spots with an estimated  
11 diameter of 0.4  $\mu\text{m}$  and with background subtraction enabled; “region growing on spots” was  
12 used to more accurately determine their intersections with surfaces. Once LRRK2 spots were  
13 created, they were segregated into two populations depending on if the distances from the spot  
14 centers to the exterior of CD63 surface objects were greater than 0.2  $\mu\text{m}$  (half the estimated  
15 diameter); this was accomplished using the “Find Spots Close To Surface” MATLAB  
16 (Mathworks, Natick, MA) algorithm from Imaris XTensions. A cell object was then created by  
17 importing CD63 surface objects as cells and LRRK2-associated spots as vesicles. The relevant  
18 statistics for each LRRK2 spot, including the cell IDs corresponding to the associated CD63  
19 surface objects, were exported. The data were aggregated in MATLAB to generate histograms.

20 *Internalization of CD63-GFP EVs by dopaminergic neurons.* Confocal z-stack images were  
21 properly converted from Zeiss CZI file format to Imaris native IMS file format, and analyzed in  
22 Imaris 9.3. The green channel with the CD63-GFP signal was first deconvolved (10 iterations) in  
23 Imaris ClearView which estimated the PSF based on a confocal fluorescence template and the  
24 acquisition parameters used. The red channel with the tdTomato signal was processed with a  
25 Gaussian Filter (0.18  $\mu\text{m}$  filter width) to reduce image noise. A total of three layers were created  
26 to represent the total neuronal surfaces, soma-only surfaces and CD63-GFP EVs. Neuronal  
27 surfaces encompassing the soma and neurites were modeled using the “surface” tool with  
28 background subtraction and a sphericity filter to remove background signal. The soma layer was  
29 modeled using the “surface” tool with background subtraction enabled, “split touching objects”  
30 enabled, and with seed point diameters of 10  $\mu\text{m}$  to eliminate non-soma surfaces. The resulting  
31 surfaces created by Imaris were manually curated if necessary, to trim and delete non-soma  
32 surfaces and ensure an accurate representation of the somas. CD63-GFP exosomes were  
33 detected as spots with an estimated diameter of 0.4  $\mu\text{m}$  and background subtraction enabled.  
34 Once CD63 spots were created, they were segregated into two populations (intracellular and  
35 extracellular) depending on their distances from the spot centers to the exterior of neuron or  
36 soma surface objects; this was accomplished using the “Find Spots Close To Surface” MATLAB  
37 (Mathworks, Natick, MA) algorithm from Imaris XTensions.

38 *Astrocyte effects on dopaminergic neurons viability and morphological changes.* Dopaminergic  
39 neurons were identified as MAP2<sup>+</sup>/TH<sup>+</sup> populations, and the number of MAP2<sup>+</sup>/TH<sup>+</sup> neurons after  
40 experimental treatments were counted as a measure of neuronal viability. The length of the  
41 dendrites was measured by tracing the MAP2 signal of dopaminergic neurons using the NIS  
42 Elements (Nikon Instruments) tracing tool. Sample identity was masked using a numerical code  
43 to blind the experimenter during image analysis.

1

## 2 **Statistical analysis**

3 Data was analyzed using GraphPad Prism version 8.0 (La Jolla, CA). P-values were calculated  
4 using two-tailed unpaired Student's t-test assuming equal standard deviation (Figures 1E, 1F,  
5 2B, 3C, 3E, 4B, 7C, 7D, 8B-C, and 8E), Mann-Whitney test (Figure 5B), Chi-square test  
6 (Figures 4D and 6B), or using one-way ANOVA with Newman-Keuls multiple comparisons  
7 (Figure 7E) or Tukey's multiple comparisons correction (Figures 8E, 9A, and 9C).

8

## 9 **Acknowledgements**

10 The authors would like to thank members of the O'Shea lab, and our colleagues Dr. Deepika  
11 Walpita, Dr. Jennifer Lippincott-Schwartz, Dr. Ulrike Heberlein, and Dr. Erik Snapp for helpful  
12 discussions and feedback, and Michelle Quiambao for administrative support. We also thank Dr.  
13 Damien Alcor and the Light Microscopy Center at Janelia for assistance setting up the imaging  
14 platform, Dr. Zhiheng Yu and the staff at Janelia's Cryo-Electron Microscopy and Electron  
15 Microscopy Center, and the staff at Janelia's Virus Services. We thank Prof. Dr. Thomas  
16 Gasser (Universitätsklinikum Tübingen) and Prof. Dr. Hans R. Schöler (Max-Planck Institute) for  
17 providing the iPSCs with the LRRK2 G2019S mutation and isogenic control. This work was  
18 supported by the Howard Hughes Medical Institute.

19

## 20 **Competing interests**

21 Erin K O'Shea: President at the Howard Hughes Medical Institute, one of the three founding  
22 funders of *eLife*.

23

## 24 **References**

- 25 Alessi, D. R., & Sammler, E. (2018). LRRK2 kinase in Parkinson's disease. *Science*, *360*(6384),  
26 36-37. doi:10.1126/science.aar5683
- 27 Allen, N. J., & Eroglu, C. (2017). Cell Biology of Astrocyte-Synapse Interactions. *Neuron*, *96*(3),  
28 697-708. doi:10.1016/j.neuron.2017.09.056
- 29 Allen, N. J., & Lyons, D. A. (2018). Glia as architects of central nervous system formation and  
30 function. *Science*, *362*(6411), 181-185. doi:10.1126/science.aat0473
- 31 Anders, S., & Huber, W. (2010). Differential expression analysis for sequence count data.  
32 *Genome Biol*, *11*(10), R106. doi:10.1186/gb-2010-11-10-r106
- 33 Andreu, Z., & Yanez-Mo, M. (2014). Tetraspanins in extracellular vesicle formation and function.  
34 *Front Immunol*, *5*, 442. doi:10.3389/fimmu.2014.00442
- 35 Banker, G. A. (1980). Trophic interactions between astroglial cells and hippocampal neurons in  
36 culture. *Science*, *209*(4458), 809-810. doi:10.1126/science.7403847
- 37 Basso, M., Pozzi, S., Tortarolo, M., Fiordaliso, F., Bisighini, C., Pasetto, L., . . . Bonetto, V.  
38 (2013). Mutant copper-zinc superoxide dismutase (SOD1) induces protein secretion



- 1 pathway alterations and exosome release in astrocytes: implications for disease  
2 spreading and motor neuron pathology in amyotrophic lateral sclerosis. *J Biol Chem*,  
3 288(22), 15699-15711. doi:10.1074/jbc.M112.425066
- 4 Bonifati, V. (2006). Parkinson's disease: the LRRK2-G2019S mutation: opening a novel era in  
5 Parkinson's disease genetics. *Eur J Hum Genet*, 14(10), 1061-1062.  
6 doi:10.1038/sj.ejhg.5201695
- 7 Cembrowski, M. S., Phillips, M. G., DiLisio, S. F., Shields, B. C., Winnubst, J., Chandrashekar,  
8 J., . . . Spruston, N. (2018). Dissociable Structural and Functional Hippocampal Outputs  
9 via Distinct Subiculum Cell Classes. *Cell*, 173(5), 1280-1292 e1218.  
10 doi:10.1016/j.cell.2018.03.031
- 11 Chaudhuri, A. D., Dastgheyb, R. M., Yoo, S. W., Trout, A., Talbot, C. C., Jr., Hao, H., . . .  
12 Haughey, N. J. (2018). TNFalpha and IL-1beta modify the miRNA cargo of astrocyte  
13 shed extracellular vesicles to regulate neurotrophic signaling in neurons. *Cell Death Dis*,  
14 9(3), 363. doi:10.1038/s41419-018-0369-4
- 15 Chiasserini, D., van Weering, J. R., Piersma, S. R., Pham, T. V., Malekzadeh, A., Teunissen, C.  
16 E., . . . Jimenez, C. R. (2014). Proteomic analysis of cerebrospinal fluid extracellular  
17 vesicles: a comprehensive dataset. *J Proteomics*, 106, 191-204.  
18 doi:10.1016/j.jprot.2014.04.028
- 19 Clarke, L. E., Liddelow, S. A., Chakraborty, C., Munch, A. E., Heiman, M., & Barres, B. A.  
20 (2018). Normal aging induces A1-like astrocyte reactivity. *Proc Natl Acad Sci U S A*,  
21 115(8), E1896-E1905. doi:10.1073/pnas.1800165115
- 22 Dawson, T. M., & Dawson, V. L. (2003). Molecular pathways of neurodegeneration in  
23 Parkinson's disease. *Science*, 302(5646), 819-822. doi:10.1126/science.1087753
- 24 de Rus Jacquet, A. (2019). Preparation and Co-Culture of iPSC-Derived Dopaminergic Neurons  
25 and Astrocytes. *Curr Protoc Cell Biol*, 85(1), e98. doi:10.1002/cpcb.98
- 26 Deemyad, T., Luthi, J., & Spruston, N. (2018). Astrocytes integrate and drive action potential  
27 firing in inhibitory subnetworks. *Nat Commun*, 9(1), 4336. doi:10.1038/s41467-018-  
28 06338-3
- 29 di Domenico, A., Carola, G., Calatayud, C., Pons-Espinal, M., Munoz, J. P., Richaud-Patin, Y., .  
30 . . . Consiglio, A. (2019). Patient-Specific iPSC-Derived Astrocytes Contribute to Non-Cell-  
31 Autonomous Neurodegeneration in Parkinson's Disease. *Stem Cell Reports*, 12(2), 213-  
32 229. doi:10.1016/j.stemcr.2018.12.011
- 33 Di Giorgio, F. P., Boulting, G. L., Bobrowicz, S., & Egan, K. C. (2008). Human embryonic stem  
34 cell-derived motor neurons are sensitive to the toxic effect of glial cells carrying an ALS-  
35 causing mutation. *Cell Stem Cell*, 3(6), 637-648. doi:10.1016/j.stem.2008.09.017
- 36 Dobin, A., Davis, C. A., Schlesinger, F., Drenkow, J., Zaleski, C., Jha, S., . . . Gingeras, T. R.  
37 (2013). STAR: ultrafast universal RNA-seq aligner. *Bioinformatics*, 29(1), 15-21.  
38 doi:10.1093/bioinformatics/bts635
- 39 Escola, J. M., Kleijmeer, M. J., Stoorvogel, W., Griffith, J. M., Yoshie, O., & Geuze, H. J. (1998).  
40 Selective enrichment of tetraspan proteins on the internal vesicles of multivesicular  
41 endosomes and on exosomes secreted by human B-lymphocytes. *J Biol Chem*, 273(32),  
42 20121-20127. doi:10.1074/jbc.273.32.20121

- 1 Fraser, K. B., Moehle, M. S., Alcalay, R. N., West, A. B., & Consortium, L. C. (2016). Urinary  
2 LRRK2 phosphorylation predicts parkinsonian phenotypes in G2019S LRRK2 carriers.  
3 *Neurology*, 86(11), 994-999. doi:10.1212/WNL.0000000000002436
- 4 Fraser, K. B., Rawlins, A. B., Clark, R. G., Alcalay, R. N., Standaert, D. G., Liu, N., . . . West, A.  
5 B. (2016). Ser(P)-1292 LRRK2 in urinary exosomes is elevated in idiopathic Parkinson's  
6 disease. *Mov Disord*, 31(10), 1543-1550. doi:10.1002/mds.26686
- 7 French, K. C., Antonyak, M. A., & Cerione, R. A. (2017). Extracellular vesicle docking at the  
8 cellular port: Extracellular vesicle binding and uptake. *Semin Cell Dev Biol*, 67, 48-55.  
9 doi:10.1016/j.semcdb.2017.01.002
- 10 Fujiwara, H., Hasegawa, M., Dohmae, N., Kawashima, A., Masliah, E., Goldberg, M. S., . . .  
11 Iwatsubo, T. (2002). alpha-Synuclein is phosphorylated in synucleinopathy lesions. *Nat*  
12 *Cell Biol*, 4(2), 160-164. doi:10.1038/ncb748
- 13 Gorbatyuk, O. S., Li, S., Sullivan, L. F., Chen, W., Kondrikova, G., Manfredsson, F. P., . . .  
14 Muzyczka, N. (2008). The phosphorylation state of Ser-129 in human alpha-synuclein  
15 determines neurodegeneration in a rat model of Parkinson disease. *Proc Natl Acad Sci*  
16 *U S A*, 105(2), 763-768. doi:10.1073/pnas.0711053105
- 17 Gore, A., Li, Z., Fung, H. L., Young, J. E., Agarwal, S., Antosiewicz-Bourget, J., . . . Zhang, K.  
18 (2011). Somatic coding mutations in human induced pluripotent stem cells. *Nature*,  
19 471(7336), 63-67. doi:10.1038/nature09805
- 20 Gu, X. L., Long, C. X., Sun, L., Xie, C., Lin, X., & Cai, H. (2010). Astrocytic expression of  
21 Parkinson's disease-related A53T alpha-synuclein causes neurodegeneration in mice.  
22 *Mol Brain*, 3, 12. doi:10.1186/1756-6606-3-12
- 23 Gu, Z., Eils, R., & Schlesner, M. (2016). Complex heatmaps reveal patterns and correlations in  
24 multidimensional genomic data. *Bioinformatics*, 32(18), 2847-2849.  
25 doi:10.1093/bioinformatics/btw313
- 26 Haidet-Phillips, A. M., Hester, M. E., Miranda, C. J., Meyer, K., Braun, L., Frakes, A., . . .  
27 Kaspar, B. K. (2011). Astrocytes from familial and sporadic ALS patients are toxic to  
28 motor neurons. *Nat Biotechnol*, 29(9), 824-828. doi:10.1038/nbt.1957
- 29 Huang da, W., Sherman, B. T., & Lempicki, R. A. (2009a). Bioinformatics enrichment tools:  
30 paths toward the comprehensive functional analysis of large gene lists. *Nucleic Acids*  
31 *Res*, 37(1), 1-13. doi:10.1093/nar/gkn923
- 32 Huang da, W., Sherman, B. T., & Lempicki, R. A. (2009b). Systematic and integrative analysis  
33 of large gene lists using DAVID bioinformatics resources. *Nat Protoc*, 4(1), 44-57.  
34 doi:10.1038/nprot.2008.211
- 35 Ioannou, M. S., Jackson, J., Sheu, S. H., Chang, C. L., Weigel, A. V., Liu, H., . . . Liu, Z. (2019).  
36 Neuron-Astrocyte Metabolic Coupling Protects against Activity-Induced Fatty Acid  
37 Toxicity. *Cell*, 177(6), 1522-1535 e1514. doi:10.1016/j.cell.2019.04.001
- 38 Jorgensen, M., Baek, R., Pedersen, S., Sondergaard, E. K., Kristensen, S. R., & Varming, K.  
39 (2013). Extracellular Vesicle (EV) Array: microarray capturing of exosomes and other  
40 extracellular vesicles for multiplexed phenotyping. *J Extracell Vesicles*, 2.  
41 doi:10.3402/jev.v2i0.20920
- 42 Kirkeby, A., Grealish, S., Wolf, D. A., Nelander, J., Wood, J., Lundblad, M., . . . Parmar, M.  
43 (2012). Generation of regionally specified neural progenitors and functional neurons

- 1 from human embryonic stem cells under defined conditions. *Cell Rep*, 1(6), 703-714.  
2 doi:10.1016/j.celrep.2012.04.009
- 3 Kriks, S., Shim, J. W., Piao, J., Ganat, Y. M., Wakeman, D. R., Xie, Z., . . . Studer, L. (2011).  
4 Dopamine neurons derived from human ES cells efficiently engraft in animal models of  
5 Parkinson's disease. *Nature*, 480(7378), 547-551. doi:10.1038/nature10648
- 6 Kumari, U., & Tan, E. K. (2009). LRRK2 in Parkinson's disease: genetic and clinical studies from  
7 patients. *FEBS J*, 276(22), 6455-6463. doi:10.1111/j.1742-4658.2009.07344.x
- 8 Lamontagne-Proulx, J., St-Amour, I., Labib, R., Pilon, J., Denis, H. L., Cloutier, N., . . . Cicchetti,  
9 F. (2019). Portrait of blood-derived extracellular vesicles in patients with Parkinson's  
10 disease. *Neurobiol Dis*, 124, 163-175. doi:10.1016/j.nbd.2018.11.002
- 11 Leng, N., Dawson, J. A., Thomson, J. A., Ruotti, V., Rissman, A. I., Smits, B. M., . . .  
12 Kendzierski, C. (2013). EBSeq: an empirical Bayes hierarchical model for inference in  
13 RNA-seq experiments. *Bioinformatics*, 29(8), 1035-1043.  
14 doi:10.1093/bioinformatics/btt087
- 15 Liddelow, S. A., & Barres, B. A. (2017). Reactive Astrocytes: Production, Function, and  
16 Therapeutic Potential. *Immunity*, 46(6), 957-967. doi:10.1016/j.immuni.2017.06.006
- 17 Liddelow, S. A., Guttenplan, K. A., Clarke, L. E., Bennett, F. C., Bohlen, C. J., Schirmer, L., . . .  
18 Barres, B. A. (2017). Neurotoxic reactive astrocytes are induced by activated microglia.  
19 *Nature*, 541(7638), 481-487. doi:10.1038/nature21029
- 20 Longo, F., Mercatelli, D., Novello, S., Arcuri, L., Brugnoli, A., Vincenzi, F., . . . Morari, M. (2017).  
21 Age-dependent dopamine transporter dysfunction and Serine129 phospho-alpha-  
22 synuclein overload in G2019S LRRK2 mice. *Acta Neuropathol Commun*, 5(1), 22.  
23 doi:10.1186/s40478-017-0426-8
- 24 Lynch-Day, M. A., Mao, K., Wang, K., Zhao, M., & Klionsky, D. J. (2012). The role of autophagy  
25 in Parkinson's disease. *Cold Spring Harb Perspect Med*, 2(4), a009357.  
26 doi:10.1101/cshperspect.a009357
- 27 Massano, J., & Bhatia, K. P. (2012). Clinical approach to Parkinson's disease: features,  
28 diagnosis, and principles of management. *Cold Spring Harb Perspect Med*, 2(6),  
29 a008870. doi:10.1101/cshperspect.a008870
- 30 a008870 [pii]
- 31 Men, Y., Yelick, J., Jin, S., Tian, Y., Chiang, M. S. R., Higashimori, H., . . . Yang, Y. (2019).  
32 Exosome reporter mice reveal the involvement of exosomes in mediating neuron to  
33 astroglia communication in the CNS. *Nat Commun*, 10(1), 4136. doi:10.1038/s41467-  
34 019-11534-w
- 35 Ostrowski, M., Carmo, N. B., Krumeich, S., Fanget, I., Raposo, G., Savina, A., . . . Thery, C.  
36 (2010). Rab27a and Rab27b control different steps of the exosome secretion pathway.  
37 *Nat Cell Biol*, 12(1), 19-30; sup pp 11-13. doi:10.1038/ncb2000
- 38 Paez-Segala, M. G., Sun, M. G., Shtengel, G., Viswanathan, S., Baird, M. A., Macklin, J. J., . . .  
39 Looger, L. L. (2015). Fixation-resistant photoactivatable fluorescent proteins for CLEM.  
40 *Nat Methods*, 12(3), 215-218, 214 p following 218. doi:10.1038/nmeth.3225
- 41 Pascua-Maestro, R., Gonzalez, E., Lillo, C., Ganfornina, M. D., Falcon-Perez, J. M., & Sanchez,  
42 D. (2018). Extracellular Vesicles Secreted by Astroglial Cells Transport Apolipoprotein D  
43 to Neurons and Mediate Neuronal Survival Upon Oxidative Stress. *Front Cell Neurosci*,  
44 12, 526. doi:10.3389/fncel.2018.00526

- 1 Pegtel, D. M., & Gould, S. J. (2019). Exosomes. *Annu Rev Biochem*, *88*, 487-514.  
2 doi:10.1146/annurev-biochem-013118-111902
- 3 Purushothaman, A. (2019). Exosomes from Cell Culture-Conditioned Medium: Isolation by  
4 Ultracentrifugation and Characterization. *Methods Mol Biol*, *1952*, 233-244.  
5 doi:10.1007/978-1-4939-9133-4\_19
- 6 Reinhardt, P., Schmid, B., Burbulla, L. F., Schondorf, D. C., Wagner, L., Glatza, M., . . .  
7 Sternecker, J. (2013). Genetic correction of a LRRK2 mutation in human iPSCs links  
8 parkinsonian neurodegeneration to ERK-dependent changes in gene expression. *Cell*  
9 *Stem Cell*, *12*(3), 354-367. doi:10.1016/j.stem.2013.01.008
- 10 Shi, M., Liu, C., Cook, T. J., Bullock, K. M., Zhao, Y., Gingham, C., . . . Zhang, J. (2014). Plasma  
11 exosomal alpha-synuclein is likely CNS-derived and increased in Parkinson's disease.  
12 *Acta Neuropathol*, *128*(5), 639-650. doi:10.1007/s00401-014-1314-y
- 13 Soldner, F., Hockemeyer, D., Beard, C., Gao, Q., Bell, G. W., Cook, E. G., . . . Jaenisch, R.  
14 (2009). Parkinson's disease patient-derived induced pluripotent stem cells free of viral  
15 reprogramming factors. *Cell*, *136*(5), 964-977. doi:10.1016/j.cell.2009.02.013
- 16 Spampinato, S. F., Bortolotto, V., Canonico, P. L., Sortino, M. A., & Grilli, M. (2019). Astrocyte-  
17 Derived Paracrine Signals: Relevance for Neurogenic Niche Regulation and Blood-Brain  
18 Barrier Integrity. *Front Pharmacol*, *10*, 1346. doi:10.3389/fphar.2019.01346
- 19 Steger, M., Tonelli, F., Ito, G., Davies, P., Trost, M., Vetter, M., . . . Mann, M. (2016).  
20 Phosphoproteomics reveals that Parkinson's disease kinase LRRK2 regulates a subset  
21 of Rab GTPases. *Elife*, *5*. doi:10.7554/eLife.12813
- 22 Tcw, J., Wang, M., Pimenova, A. A., Bowles, K. R., Hartley, B. J., Lacin, E., . . . Brennand, K. J.  
23 (2017). An Efficient Platform for Astrocyte Differentiation from Human Induced  
24 Pluripotent Stem Cells. *Stem Cell Reports*, *9*(2), 600-614.  
25 doi:10.1016/j.stemcr.2017.06.018
- 26 Temoche-Diaz, M. M., Shurtleff, M. J., Nottingham, R. M., Yao, J., Fadadu, R. P., Lambowitz, A.  
27 M., & Schekman, R. (2019). Distinct mechanisms of microRNA sorting into cancer cell-  
28 derived extracellular vesicle subtypes. *Elife*, *8*. doi:10.7554/eLife.47544
- 29 Thompson, A. G., Gray, E., Heman-Ackah, S. M., Mager, I., Talbot, K., Andaloussi, S. E., . . .  
30 Turner, M. R. (2016). Extracellular vesicles in neurodegenerative disease - pathogenesis  
31 to biomarkers. *Nat Rev Neurol*, *12*(6), 346-357. doi:10.1038/nrneuro.2016.68
- 32 Valenza, M., Marullo, M., Di Paolo, E., Cesana, E., Zuccato, C., Biella, G., & Cattaneo, E.  
33 (2015). Disruption of astrocyte-neuron cholesterol cross talk affects neuronal function in  
34 Huntington's disease. *Cell Death Differ*, *22*(4), 690-702. doi:10.1038/cdd.2014.162
- 35 Venturini, A., Passalacqua, M., Pelassa, S., Pastorino, F., Tedesco, M., Cortese, K., . . .  
36 Cervetto, C. (2019). Exosomes From Astrocyte Processes: Signaling to Neurons. *Front*  
37 *Pharmacol*, *10*, 1452. doi:10.3389/fphar.2019.01452
- 38 Wang, S., Liu, Z., Ye, T., Mabrouk, O. S., Maltbie, T., Aasly, J., & West, A. B. (2017). Elevated  
39 LRRK2 autophosphorylation in brain-derived and peripheral exosomes in LRRK2  
40 mutation carriers. *Acta Neuropathol Commun*, *5*(1), 86. doi:10.1186/s40478-017-0492-y
- 41 West, A. B., Moore, D. J., Biskup, S., Bugayenko, A., Smith, W. W., Ross, C. A., . . . Dawson, T.  
42 M. (2005). Parkinson's disease-associated mutations in leucine-rich repeat kinase 2  
43 augment kinase activity. *Proc Natl Acad Sci U S A*, *102*(46), 16842-16847.  
44 doi:10.1073/pnas.0507360102

- 1 Willis, C. M., Menoret, A., Jellison, E. R., Nicaise, A. M., Vella, A. T., & Crocker, S. J. (2017). A  
2 Refined Bead-Free Method to Identify Astrocytic Exosomes in Primary Glial Cultures and  
3 Blood Plasma. *Front Neurosci*, *11*, 335. doi:10.3389/fnins.2017.00335
- 4 Winston, C. N., Romero, H. K., Ellisman, M., Nauss, S., Julovich, D. A., Conger, T., . . .  
5 Rissman, R. A. (2019). Assessing Neuronal and Astrocyte Derived Exosomes From  
6 Individuals With Mild Traumatic Brain Injury for Markers of Neurodegeneration and  
7 Cytotoxic Activity. *Front Neurosci*, *13*, 1005. doi:10.3389/fnins.2019.01005
- 8 Yoshioka, Y., Konishi, Y., Kosaka, N., Katsuda, T., Kato, T., & Ochiya, T. (2013). Comparative  
9 marker analysis of extracellular vesicles in different human cancer types. *J Extracell*  
10 *Vesicles*, *2*. doi:10.3402/jev.v2i0.20424
- 11 Zamanian, J. L., Xu, L., Foo, L. C., Nouri, N., Zhou, L., Giffard, R. G., & Barres, B. A. (2012).  
12 Genomic analysis of reactive astrogliosis. *J Neurosci*, *32*(18), 6391-6410.  
13 doi:10.1523/JNEUROSCI.6221-11.2012
- 14 Zhao, Z. H., Chen, Z. T., Zhou, R. L., Zhang, X., Ye, Q. Y., & Wang, Y. Z. (2018). Increased DJ-  
15 1 and alpha-Synuclein in Plasma Neural-Derived Exosomes as Potential Markers for  
16 Parkinson's Disease. *Front Aging Neurosci*, *10*, 438. doi:10.3389/fnagi.2018.00438
- 17 Zorita, E., Cusco, P., & Fillion, G. J. (2015). Starcode: sequence clustering based on all-pairs  
18 search. *Bioinformatics*, *31*(12), 1913-1919. doi:10.1093/bioinformatics/btv053



A

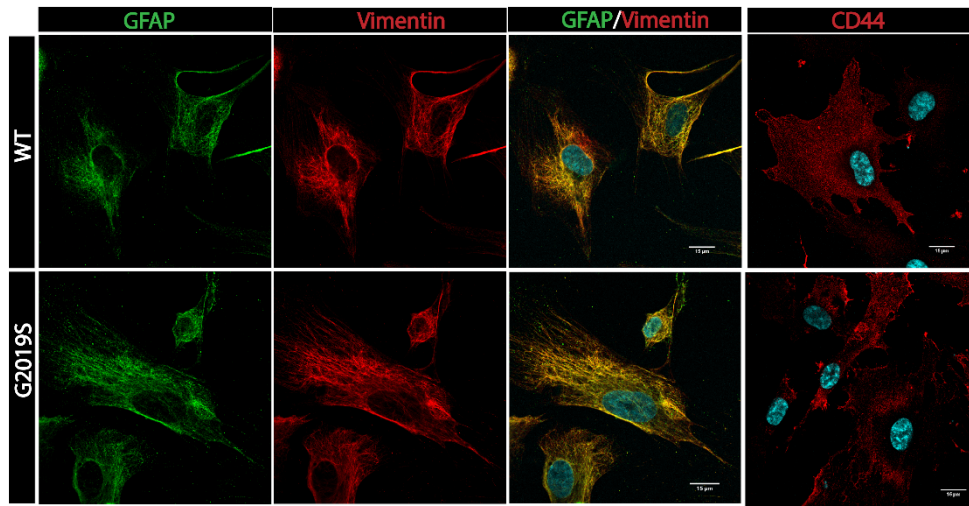

B

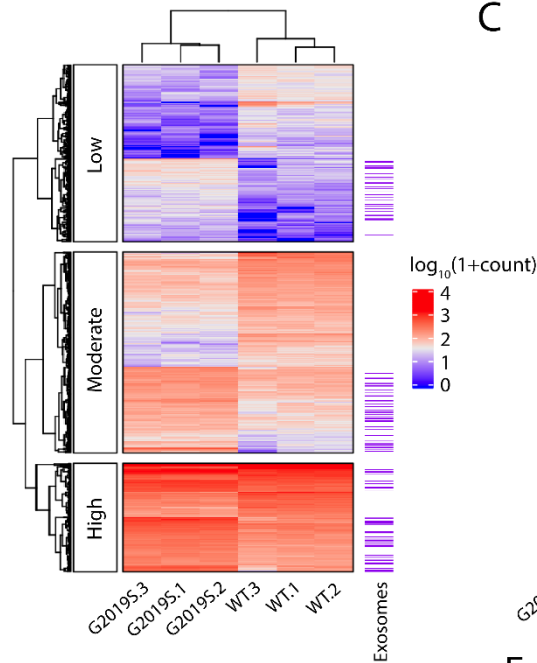

C

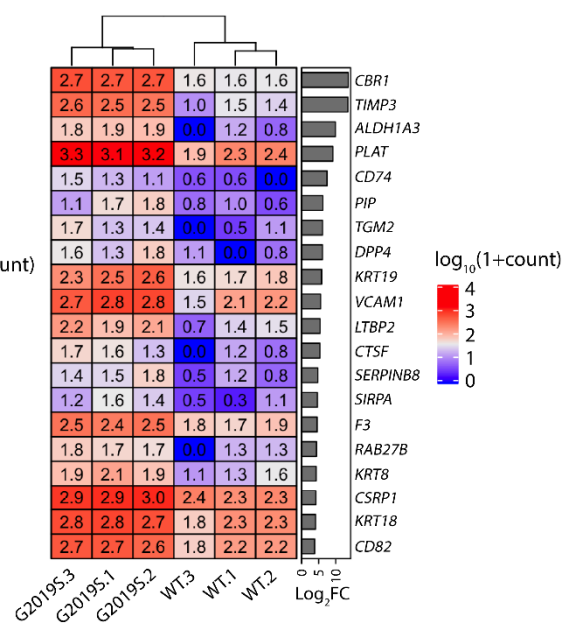

D

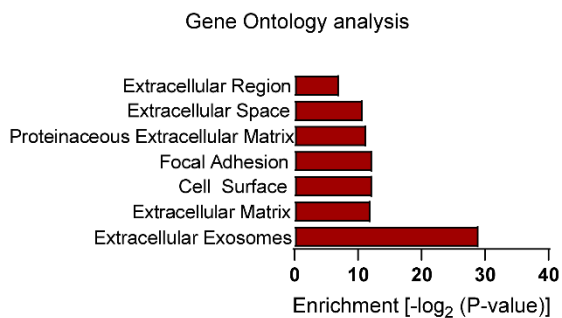

E

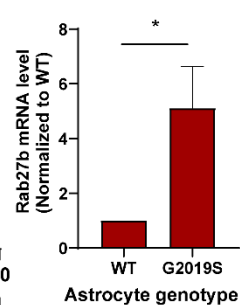

F

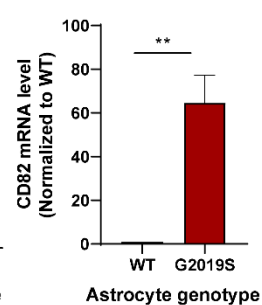

1

2 **Figure 1. Expression of exosome components is dysregulated in LRRK2 G2019S**  
 3 **astrocytes.** (A) Astrocytes were prepared from iPSCs carrying the PD mutation LRRK2  
 4 G2019S or its isogenic control. Confocal images of immunostained iPSC-derived astrocytes

1 show expression of astrocyte markers GFAP (green), vimentin (red), merged GFAP (green) and  
2 vimentin (red) with the nuclear marker DAPI (blue), and merged astrocyte marker CD44 (red)  
3 with DAPI (blue). (B) Heatmap representing the hierarchical clustering of significantly  
4 upregulated and downregulated genes in LRRK2 G2019S vs WT astrocytes using a 1.4-fold  
5 threshold for up-regulated genes and a 0.7-fold threshold for down-regulated genes, and a false  
6 discovery rate of 0.05. Sequencing counts were normalized using the median of ratios method  
7 and calculated by the EBseq package in R, as described in Materials and Methods, then  
8 transformed using  $\log_{10}(1+\text{normalized sequencing counts})$ . The genes are separated into three  
9 categories based on their  $\log_{10}(1+\text{normalized sequencing counts})$  value using k-means  
10 clustering with  $k=3$  to reveal groups of low, moderate or high expression genes. Genes  
11 encoding exosome-related components are indicated on the right (purple lines, with each  
12 indicating one gene). (C) Heatmap representing the differential expression of 20 genes  
13 encoding exosome components in WT and LRRK2 G2019S astrocytes, across three  
14 independent biological replicates (labeled 1 to 3). The values represent the  $\log_{10}(1+\text{normalized}$   
15  $\text{sequencing counts})$  transformation as described in Materials and Methods,  $\log_2\text{FC}$  represents  
16 LRRK2 G2019S vs WT fold change in gene expression. Genes are sorted by their  $\log_2\text{FC}$  value  
17 in order of descending fold-change. (D) Gene ontology analysis of up-regulated genes identified  
18 by RNA sequencing, and Benjamini-Hochberg adjusted P-values were obtained from the  
19 Database for Annotation, Visualization and Integrated Discovery (DAVID) tool. (E, F) Gene  
20 expression validation by qPCR of two exosome components, Rab27b (E) and CD82 (F). Data  
21 are from four independent biological replicates; error bars represent mean + standard error of  
22 the mean (SEM). Statistical analysis was performed using two-tailed unpaired Student's t-test  
23 with equal standard deviation (s.d.) (\*  $p \leq 0.05$ , \*\*  $p < 0.01$ ).

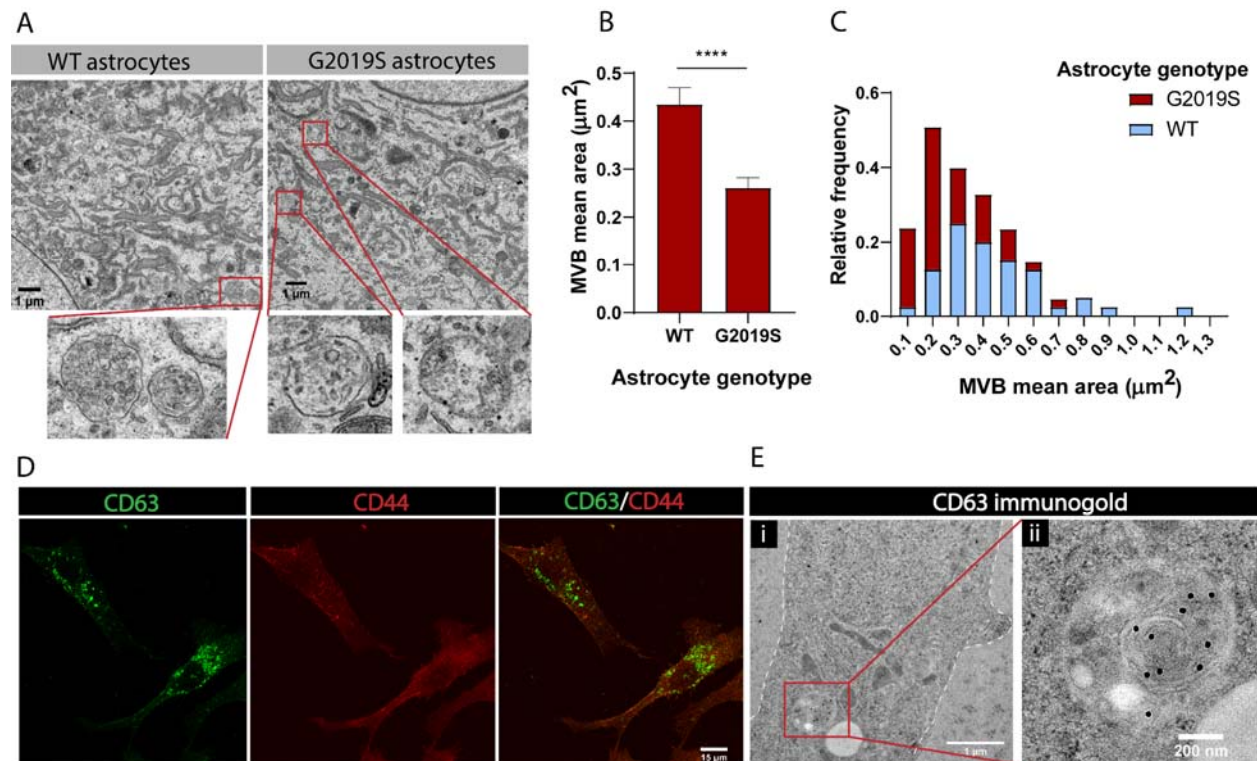

1  
2 **Figure 2. MVBs in LRRK2 G2019S astrocytes are smaller than in WT astrocytes.** (A)  
3 Transmission electron microscopy (TEM) images of multi vesicular bodies (MVBs) in WT and  
4 LRRK2 G2019S astrocytes. For illustration purposes, the red boxes in the top panel indicate  
5 MVBs in the cytoplasm of astrocytes and the lower panel shows a zoomed-in view of the MVBs.  
6 (B, C) Quantification of mean area (B) and size distribution (C) of MVBs identified in TEM  
7 images of WT and LRRK2 G2019S astrocytes. Data are sampled from at least 20 cells ( $\geq 40$   
8 MVBs) in each experimental condition; error bars represent mean + SEM for two independent  
9 biological samples (B). Statistical analysis was performed using two-tailed unpaired Student's t-  
10 test with equal s.d. (\*\*\*\* < p 0.0001). (D) Representative confocal images of astrocytes labeled  
11 by immunofluorescence with the exosome marker CD63 (green) and the astrocyte marker CD44  
12 (red). (E) Electron microscopy image showing immunogold labeling of CD63 (large gold) in  
13 astrocytes. The dashed line delineates the astrocyte cell membrane (Ei). The red box indicates  
14 an MVB, and the zoomed-in image shows CD63 gold particles inside an MVB (Eii).

15

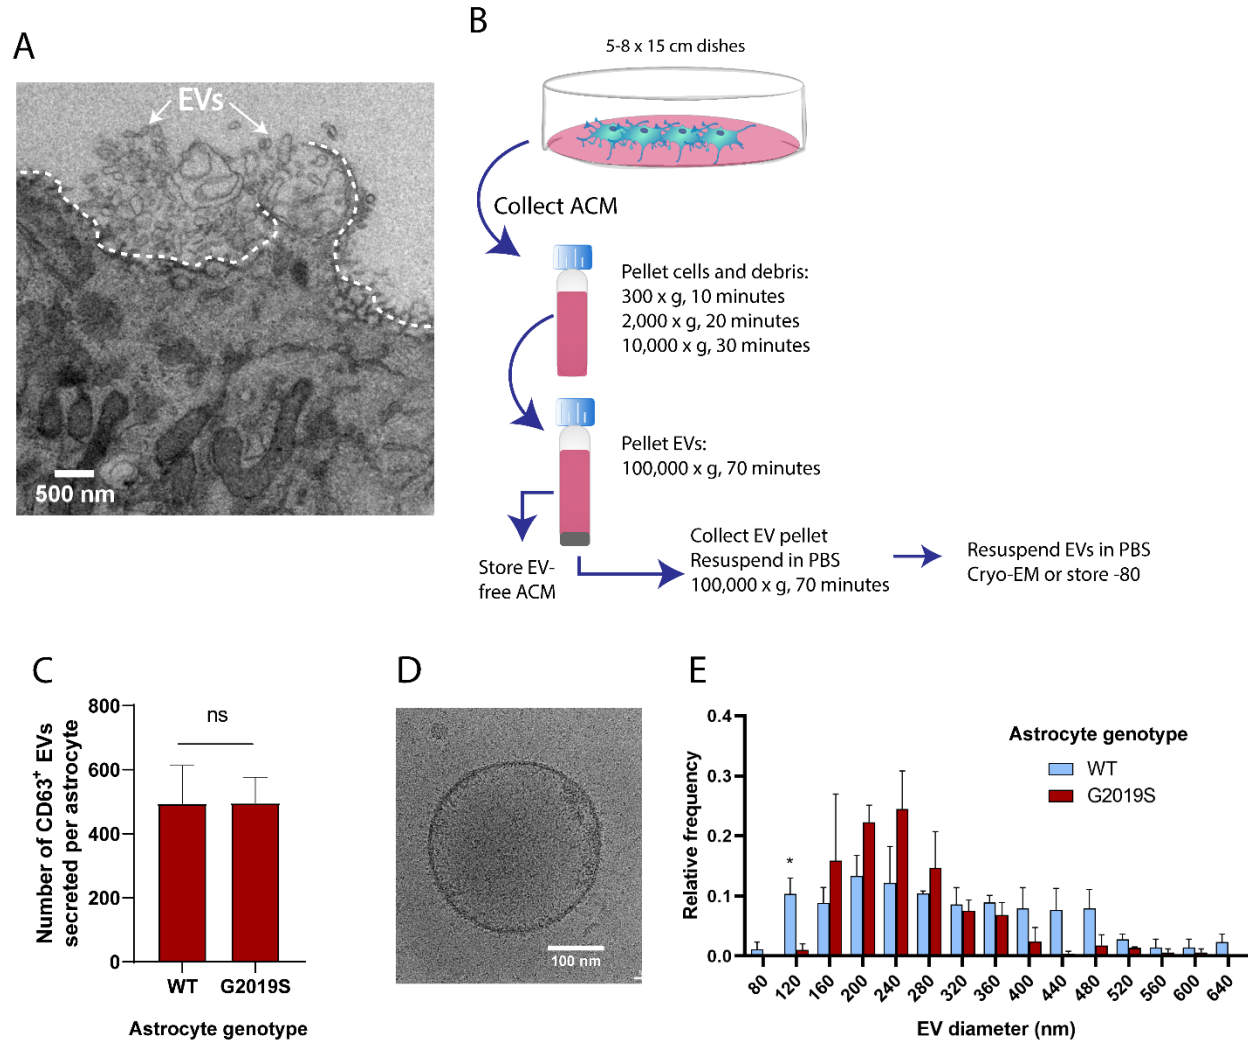

1  
2 **Figure 3. The size distribution of extracellular vesicles (EVs) secreted by astrocytes is**  
3 **altered in the LRRK2 G2019S mutant.** (A) TEM images demonstrate that iPSC-derived  
4 astrocytes actively produce and secrete EVs by exocytosis. The dashed line delineates the  
5 plasma membrane. The white arrows indicate EVs. (B) Overview of the procedure to isolate  
6 EVs by ultracentrifugation. ACM: astrocyte conditioned medium, Cryo-EM: cryogenic electron  
7 microscopy. (C) Quantification of the number of CD63<sup>+</sup> EVs secreted in WT and LRRK2  
8 G2019S ACM by ELISA, using ELISA standards calibrated by nanoparticle tracking analysis as  
9 discussed in Materials and Methods. Data are from at least three independent biological  
10 replicates; error bars represent mean + SEM. Statistical analysis was performed using two-  
11 tailed unpaired Student's t-test with equal s.d. (ns: not significant). (D, E) Secreted EVs were  
12 imaged by cryo-EM (D) and their diameter was measured (E). Data are from  $\geq 177$  EVs isolated  
13 from ACM taken from  $30.4 \times 10^6$  plated astrocytes for each experimental condition; error bars  
14 are mean + SEM for three independent biological replicates. Statistical analysis was performed  
15 using two-tailed unpaired Student's t-test with equal s.d. (\*  $p \leq 0.05$ ).



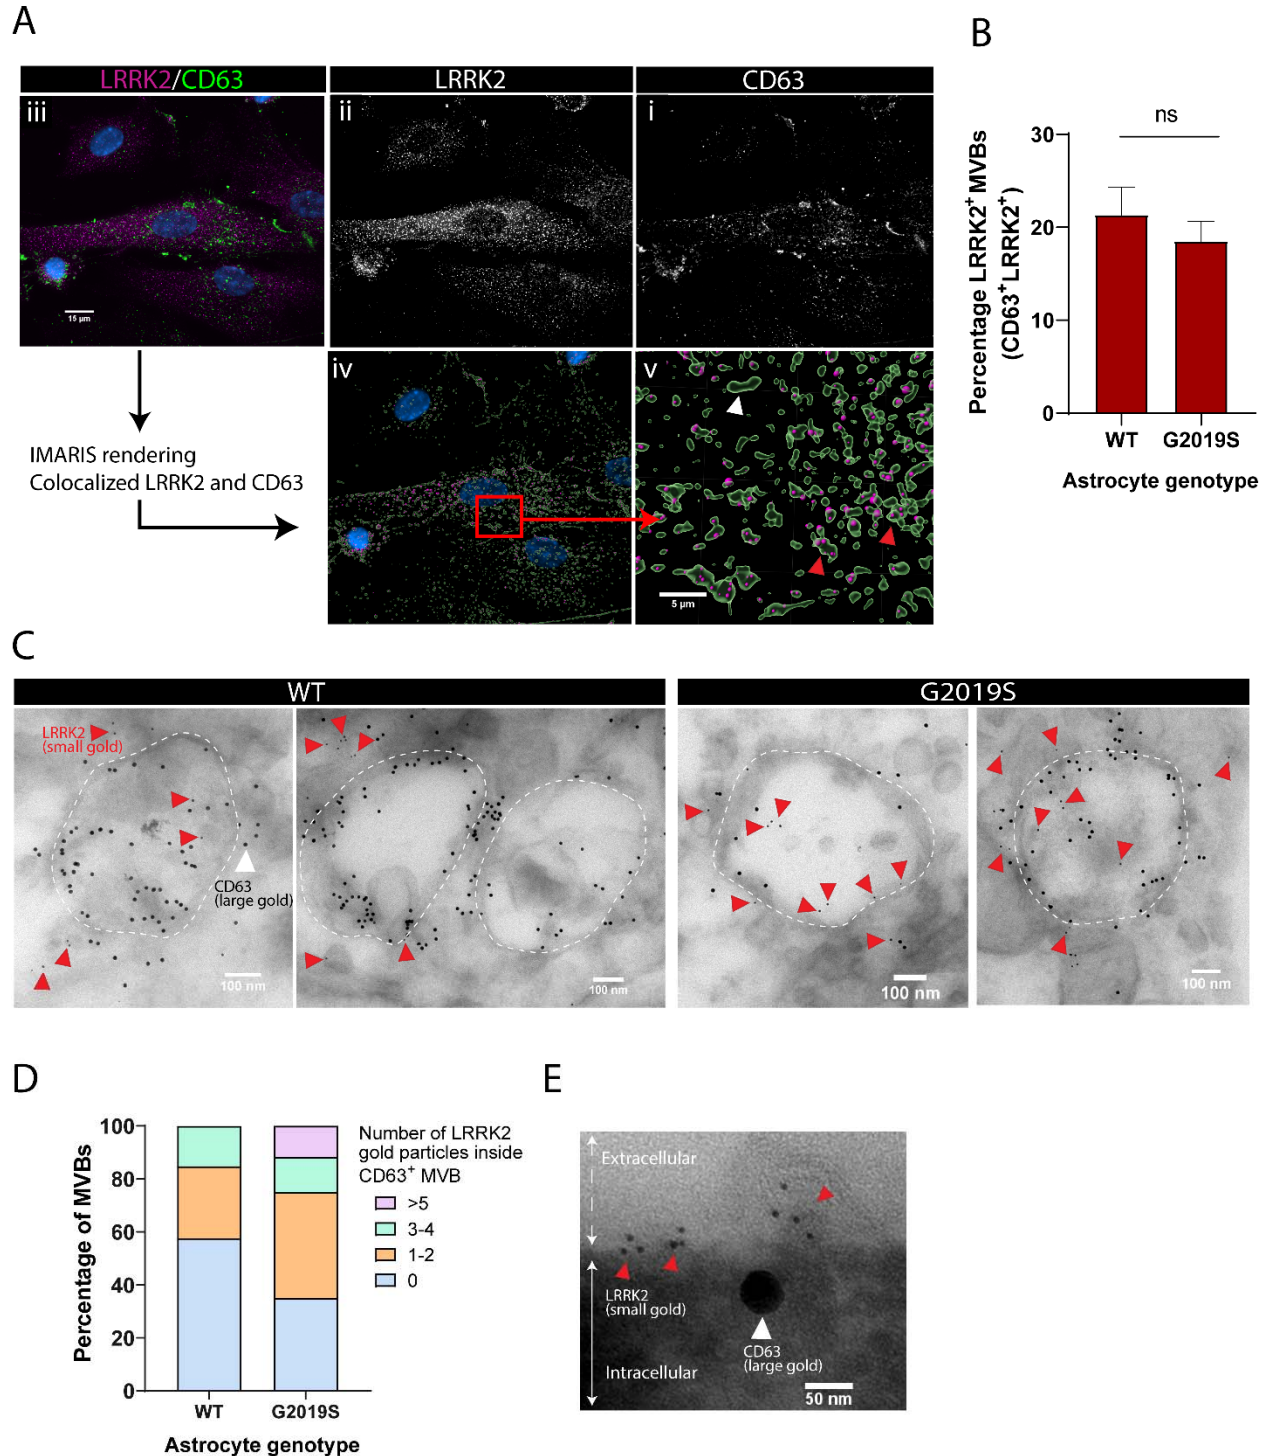

1

2 **Figure 4. LRRK2 is associated with MVBs in astrocytes and accumulates in the MVBs of**  
 3 **LRRK2 G2019S mutant.** (A) Representative images of astrocytes labeled by  
 4 immunofluorescence with CD63 (Ai), LRRK2 (Aii), and merged CD63 (green), LRRK2 (purple)  
 5 and the nuclear marker DAPI (blue) (Aiii). The images were analyzed using IMARIS software to  
 6 identify CD63<sup>+</sup> MVBs (green surfaces) colocalized with LRRK2 (purple dots), and show the  
 7 localization of the nucleus (DAPI, blue) (Aiv). A zoomed-in image shows two populations of



1 CD63<sup>+</sup> surfaces: CD63<sup>+</sup>/LRRK2<sup>+</sup> (red arrowhead), and CD63<sup>+</sup>/LRRK2<sup>-</sup> (white arrowhead) (Av).  
2 (B) Percentage of CD63-labeled surfaces that are also LRRK2 positive in WT and LRRK2  
3 G2019S astrocytes, quantified with Imaris software using object-based colocalization. Data are  
4 from three independent biological replicates, and  $\geq 40$  astrocytes ( $> 3,000$  MVBs) were  
5 analyzed per experimental condition; error bars represent mean + SEM. Statistical analysis was  
6 performed using two-tailed unpaired Student's t-test with equal s.d. (ns: not significant). (C)  
7 Immunogold electron microscopy shows the presence of LRRK2 (small gold, red arrowheads)  
8 inside and in the vicinity of CD63<sup>+</sup> MVBs (large gold) in WT and LRRK2 G2019S astrocytes.  
9 The dashed lines indicate the contour of MVBs. (D) Distribution of CD63<sup>+</sup> MVBs according to  
10 their number of internal LRRK2 gold particles. Data are sampled from at least 20 astrocytes ( $\geq$   
11 59 MVBs) in each experimental condition. The distribution is significantly different in LRRK2  
12 G2019S astrocytes compared to WT astrocytes (P-value = 0.0084, Chi-square test). (E)  
13 Immunogold electron microscopy shows the secretion of LRRK2 (small gold, red arrowheads)  
14 and EVs from a CD63<sup>+</sup> MVB (large gold, white arrowhead). The dashed line indicates the  
15 extracellular compartment, the solid line indicates the intracellular compartment.

16

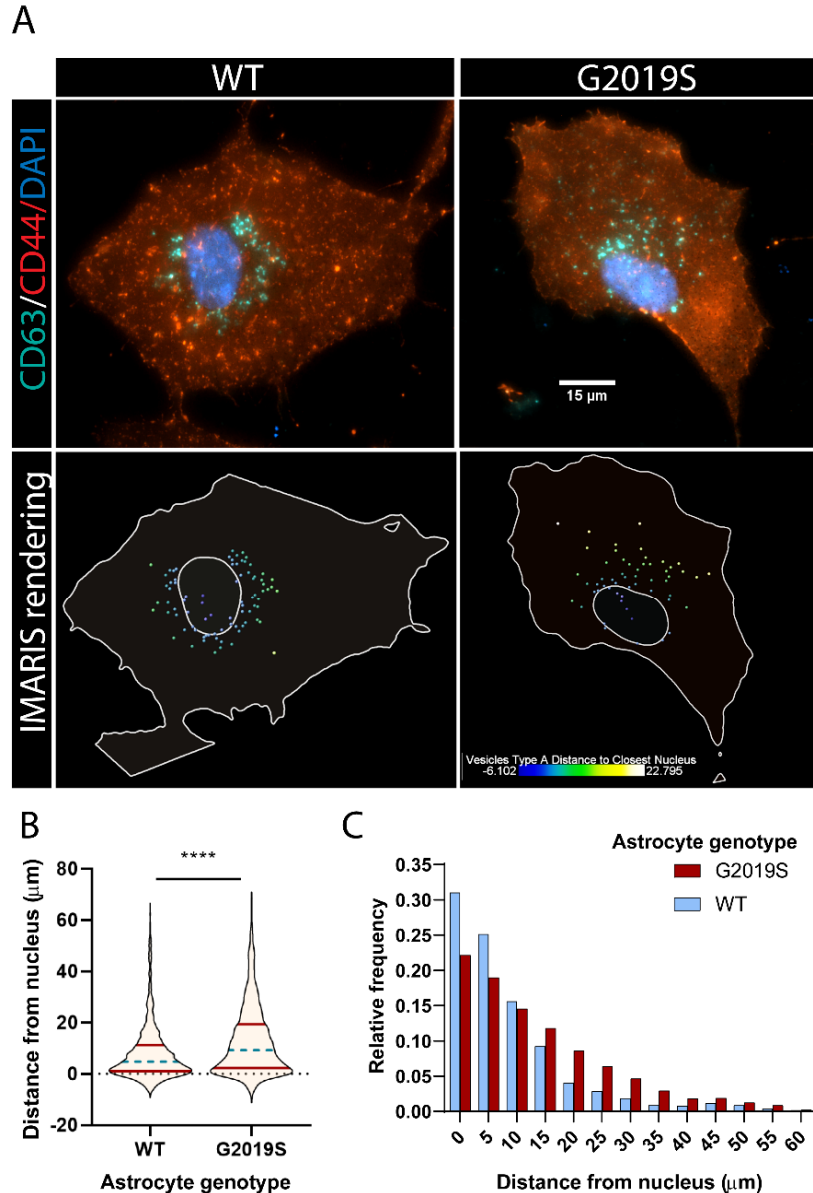

1  
2 **Figure 5. The spatial distribution of MVBs in LRRK2 G2019S astrocytes is altered.** (A)  
3 Representative immunofluorescence images of WT and LRRK2 G2019S astrocytes labeled with  
4 the exosome marker CD63 (green), the astrocyte marker CD44 (red) and the nuclear marker  
5 DAPI (dark blue). The bottom images show the corresponding IMARIS software rendering of  
6 CD63<sup>+</sup> MVBs, color-coded by distance to the nucleus, from blue (closest) to white (farthest).  
7 The plain white lines indicate the cell boundary (outer line) and nucleus (inner circle). (B, C)  
8 Quantification of the distance of CD63<sup>+</sup> MVBs from the nuclear membrane in WT and LRRK2  
9 G2019S astrocytes using IMARIS software “vesicles distance to closest nucleus” calculation.  
10 The violin plot shows the median (blue dashed line) and interquartile range (red solid line) (B).  
11 Data are from three independent biological replicates, 40-70 astrocytes (> 3,300 MVBs) were  
12 analyzed for each experimental condition. Statistical analysis was performed using a Mann-  
13 Whitney test (\*\*\*\*  $p < 0.0001$ ).

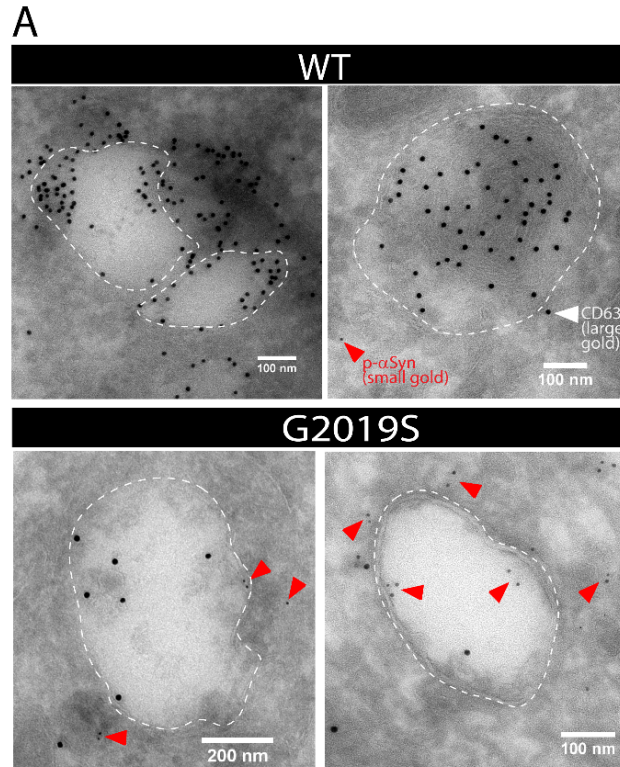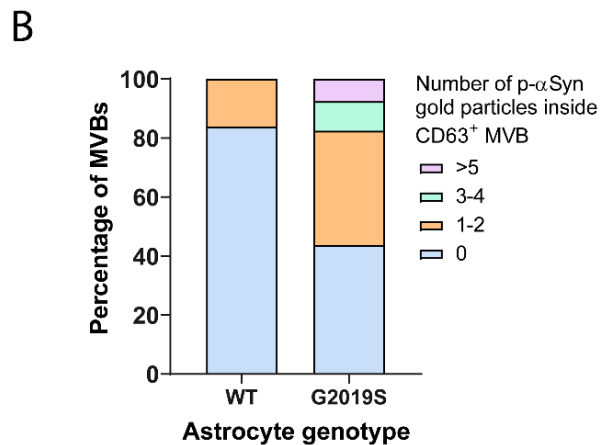

1  
2 **Figure 6. Alpha-synuclein and phospho-S129 alpha-synuclein are associated with MVBs**  
3 **in astrocytes and accumulate in the MVBs of LRRK2 G2019S mutant.** (A) Immunogold  
4 labeling of phospho-S129 alpha-synuclein (p- $\alpha$ Syn, small gold, red arrowheads) and CD63  
5 (large gold) shows localization of p- $\alpha$ Syn inside and in the vicinity of MVBs in astrocytes. The  
6 low abundance of small gold particles in the control sample is consistent with the observation  
7 that healthy brain tissues contain low levels of p- $\alpha$ Syn (Fujiwara et al., 2002). The dashed lines  
8 indicate the boundary of the MVBs. (B) Distribution of CD63<sup>+</sup> MVBs according to their number of  
9 internal p- $\alpha$ Syn gold particles, in WT and LRRK2 G2019S astrocytes. Data are sampled from at  
10 least 20 astrocytes (30-79 MVBs) for each experimental condition. The distribution is  
11 significantly different in LRRK2 G2019S astrocytes compared to WT astrocytes (P-value =  
12 0.0014, Chi-square test).

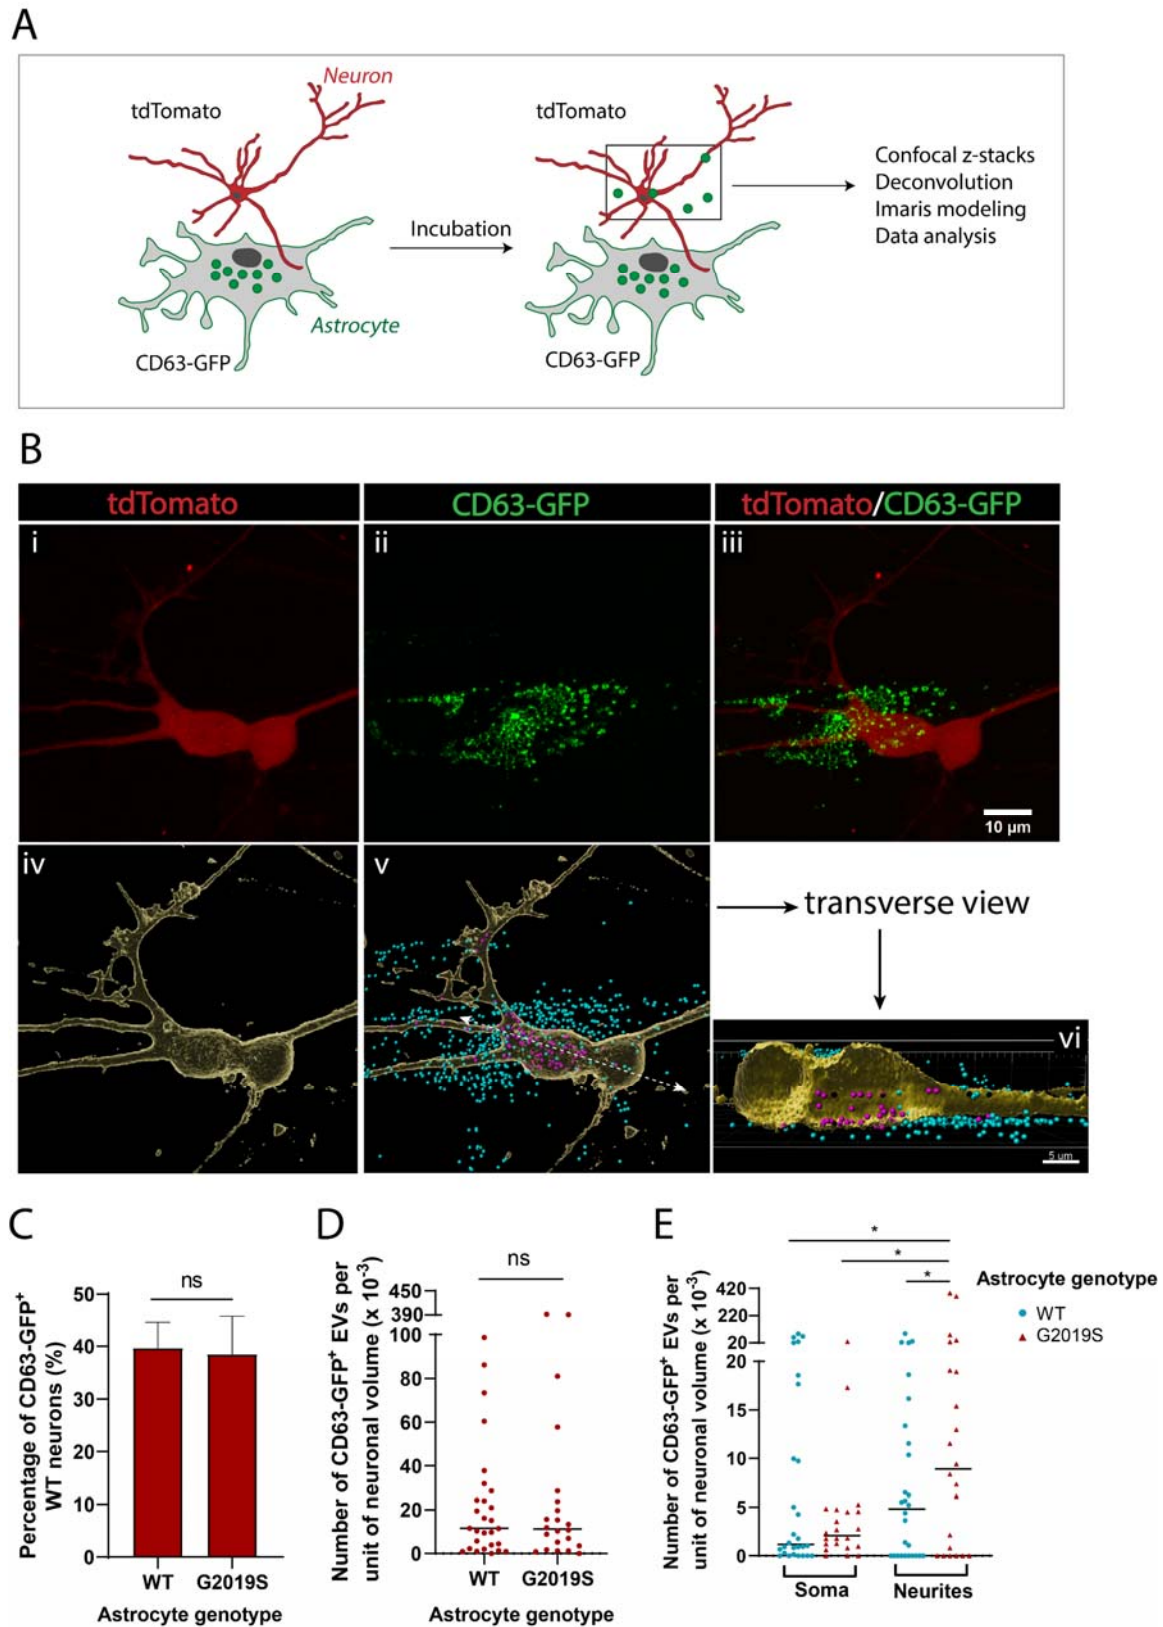

1 (red), and WT or LRRK2 G2019S astrocytes were transduced with lenti-CD63-GFP (green) to  
2 produce green-labeled exosomes. Neurons and astrocytes were co-cultured, and uptake of  
3 CD63-GFP exosomes by neurons was monitored by live-cell confocal microscopy, followed by  
4 deconvolution and Imaris modeling. (B) Confocal images of tdTomato neurons (Bi), CD63-GFP  
5 astrocytes (Bii) and the merged image (Biii). The corresponding IMARIS software rendering  
6 represents tdTomato neurons in yellow (Biv), and the CD63-GFP exosomes in blue (outside the  
7 neurons) or purple (inside the neurons) (Bv). A transverse view of a neuron shows purple-  
8 labeled exosomes inside the somas and neurites (Bvi). (C) Quantification of the percentage of  
9 neurons with internalized WT or LRRK2 G2019S CD63-GFP exosomes at the time of live-cell  
10 imaging. (D) Quantification of the number of CD63-GFP exosomes per unit of neuronal volume.  
11 (E) Quantification of the number of CD63-GFP exosomes per unit of soma or neurite volume.  
12 For all datasets: data are from three independent biological replicates,  $\geq 80$  neurons were  
13 analyzed for each experimental condition. The scatter plot shows the median value. Statistical  
14 analysis was performed using two-tailed unpaired Student's t-test with equal s.d. (C, D), or one-  
15 way ANOVA with Newman-Keuls multiple comparisons (E) (ns: not significant, \*  $p \leq 0.05$ ).



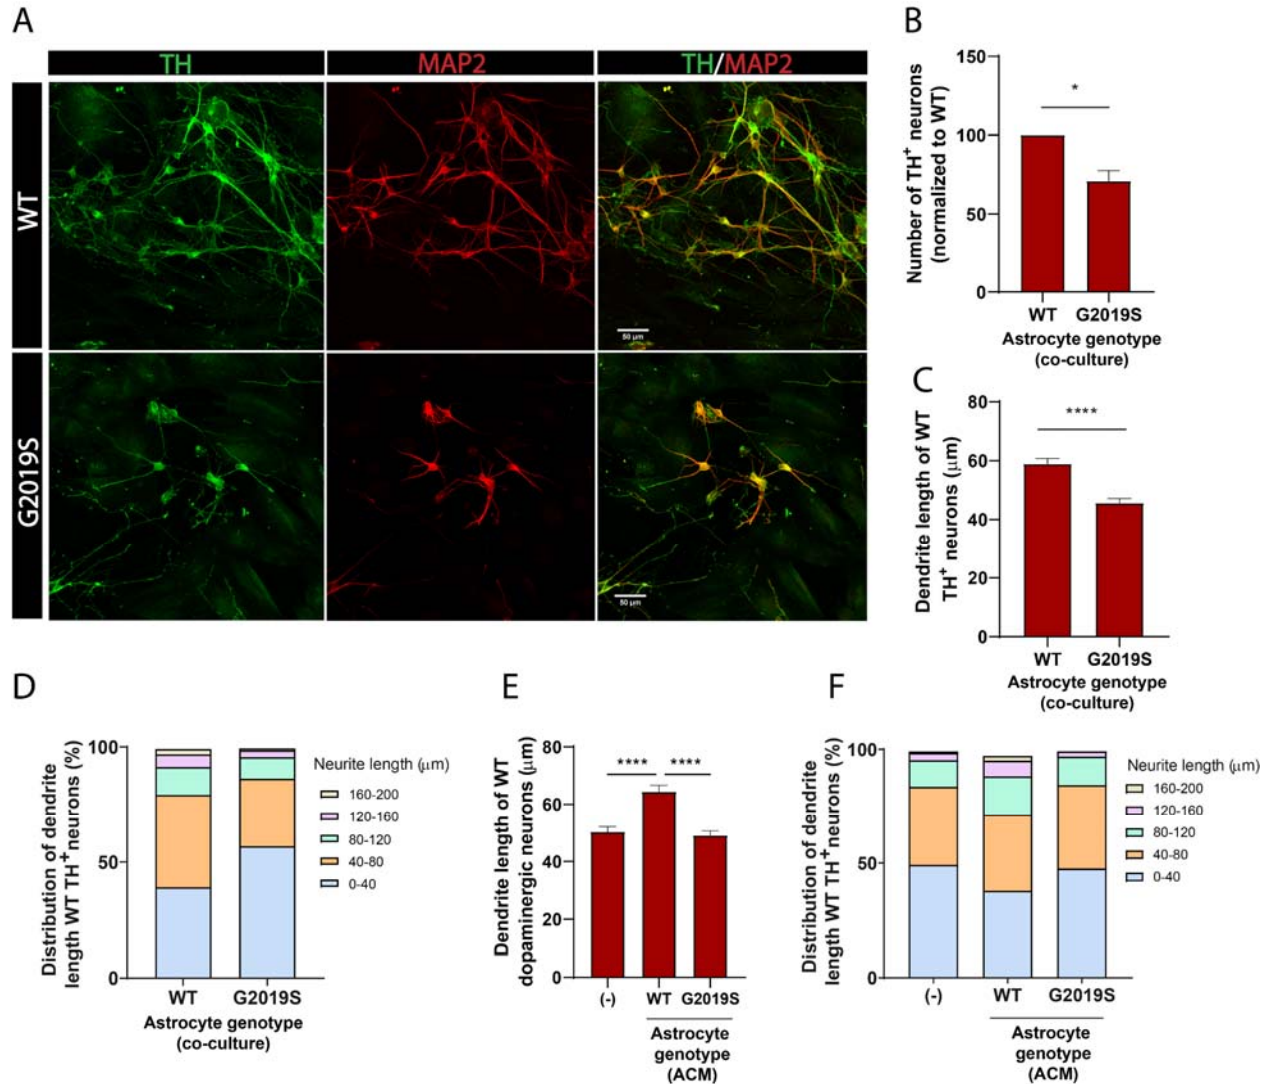

1  
2 **Figure 8. LRRK2 G2019S astrocytes affect the viability and morphology of dopaminergic**  
3 **neurons.** (A) Confocal images showing neurons labeled by immunofluorescence with the pan-  
4 neuronal and dendrite marker MAP2 (red), the marker for dopaminergic neurons TH (green),  
5 and the merged image (MAP2, red and TH, green). MAP2: microtubule-associated protein 2,  
6 TH: tyrosine hydroxylase. (B-D) Quantification of neuron viability (number of dopaminergic  
7 neurons remaining in culture) (B), average dendrite length (C), and dendrite length distribution  
8 (D) after 14 days in culture with WT or LRRK2 G2019S astrocytes. Viability data are from five  
9 independent biological replicates, and an average of 810 WT and 530 LRRK2 G2019S neurons  
10 were counted (B). Dendrite length data are from three independent biological replicates, and  
11 more than 500 neurites were measured for each experimental condition (C-D). (E-F) WT  
12 dopaminergic neurons were cultured for 14 days with basal medium (-), WT or LRRK2 G2019S  
13 ACM, and the resulting dendrite length average (E) and distribution (D) were quantified. The  
14 data are from three independent biological replicates, and more than 450 neurites were  
15 measured per experimental condition. For all datasets, error bars represent mean + SEM (B, C,  
16 E); statistical analysis was performed using two-tailed unpaired Student's t-test with equal s.d.  
17 (B, C) or one-way ANOVA with Tukey's multiple comparisons correction (E) (\*  $p \leq 0.05$ , \*\*\*\*

- 1 p<0.0001). Results shown in panel B support similar observations recently documented in a
- 2 non-isogenic model system (di Domenico et al., 2019).

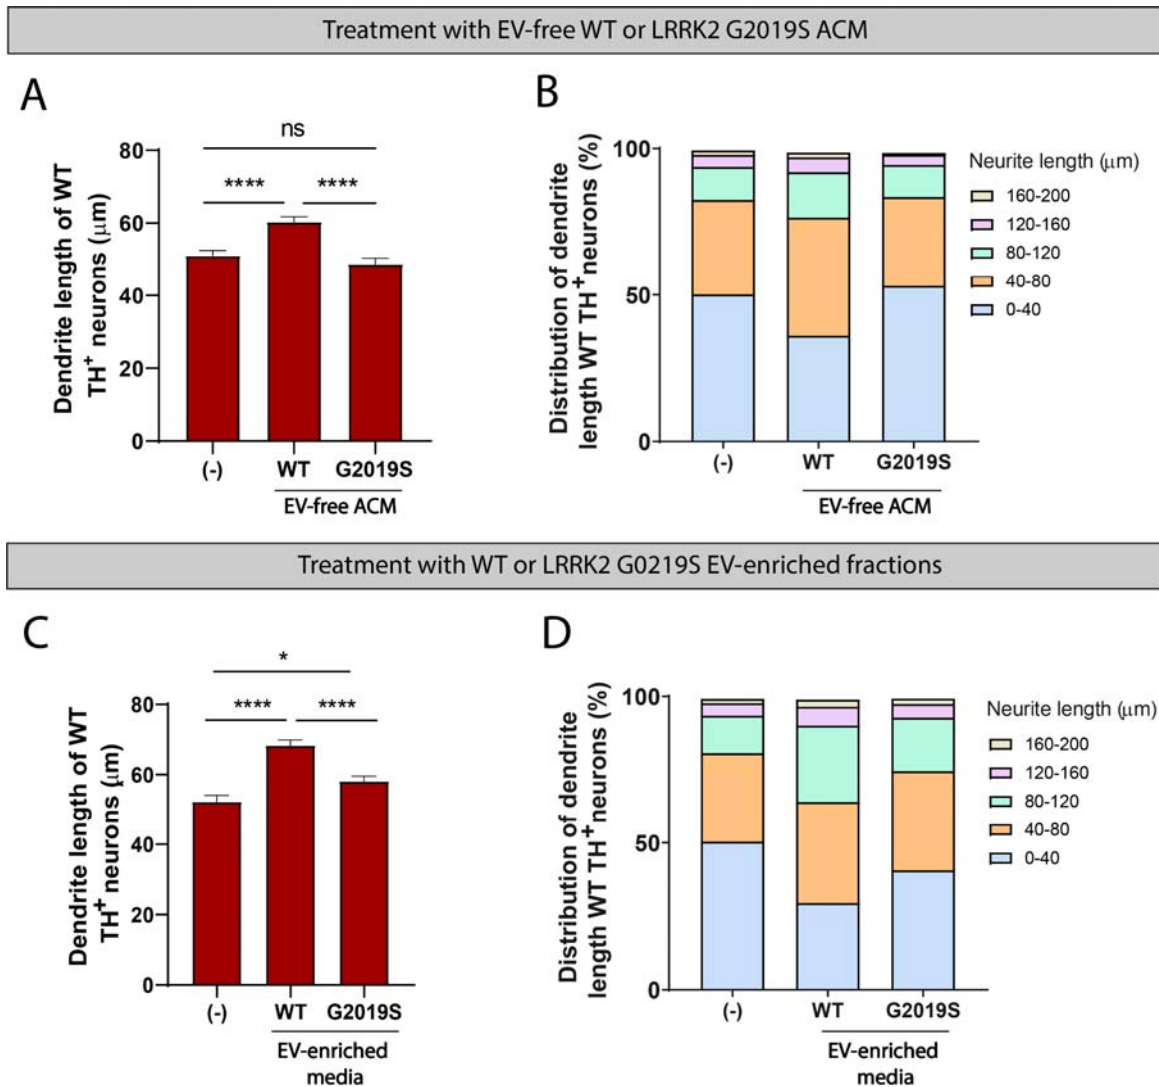

1  
2 **Figure 9. WT but not LRRK2 G2019S astrocytes release neurotrophic factors via two**  
3 **distinct secretory pathways to support the growth of dopaminergic neurons.** (A, B)  
4 Quantification of the average (A) and distribution (B) of dendrite lengths of WT dopaminergic  
5 neurons cultured for 14 days with basal medium (-), or WT or LRRK2 G2019S EV-free ACM.  
6 Data are from four independent biological replicates, and  $\geq 650$  neurites were measured for  
7 each experimental condition. (C, D) Quantification of the average (C) and distribution (D) of  
8 dendrite lengths of WT dopaminergic neurons cultured for 14 days with basal medium (-), or WT  
9 or LRRK2 G2019S EV-enriched fractions. Data are from three independent biological replicates,  
10 and  $\geq 450$  dendrite were measured for each experimental condition. Error bars represent mean  
11 + SEM (A, C), and statistical analysis was performed using one-way ANOVA with Tukey's  
12 multiple comparisons correction (ns: not significant, \*  $p \leq 0.05$ , \*\*\*\*  $p < 0.0001$ ).

13

1 **The LRRK2 G2019S mutation alters astrocyte-to-neuron communication via**  
2 **extracellular vesicles and induces neuron atrophy in a human iPSC-derived**  
3 **model of Parkinson's disease**

4

5 Aurelie de Rus Jacquet<sup>1\*</sup>, Jenna L. Tancredi<sup>1</sup>, Andrew L. Lemire<sup>1</sup>, Michael C. DeSantis<sup>1</sup>, Wei-  
6 Ping Li<sup>1</sup>, Erin K. O'Shea<sup>1\*</sup>

7

8 <sup>1</sup>Janelia Research Campus, Howard Hughes Medical Institute, Ashburn, VA, 20147

9 \*Co-corresponding authors: Aurelie de Rus Jacquet : aureliederus@gmail.com; Erin O'Shea :  
10 osheae@hhmi.org

11

---

12

13 **Supplementary Files**

---

14

15

16

**A**

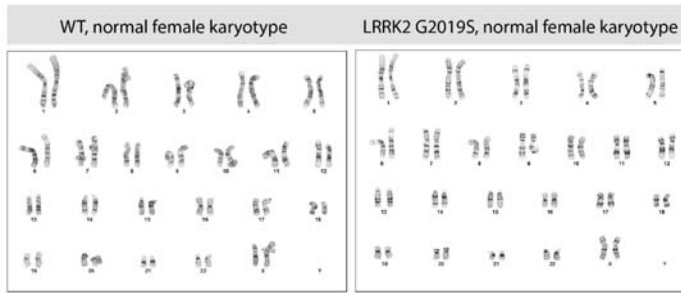

**B**

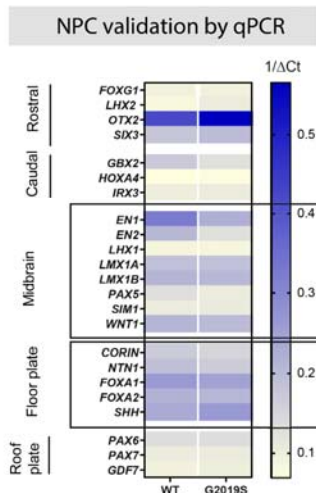

**C**

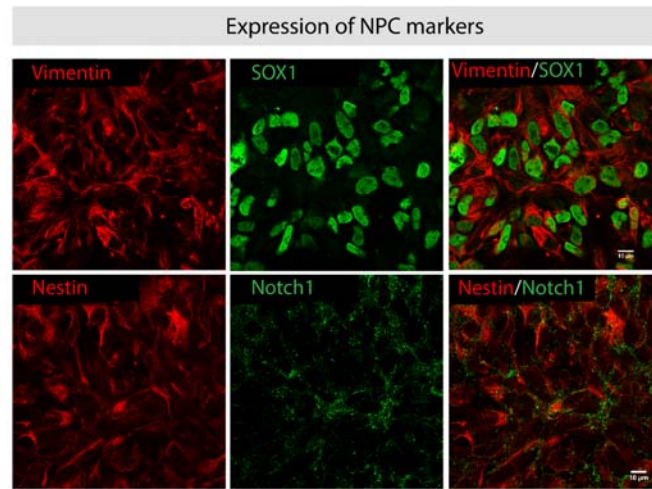

**D**

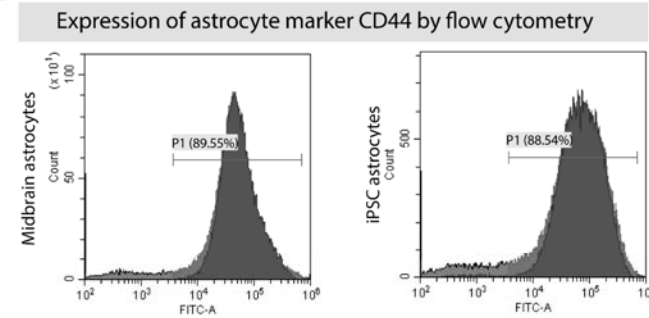

Validation of iPSC-derived NPC and astrocyte transcriptomic signature and identity

**E**

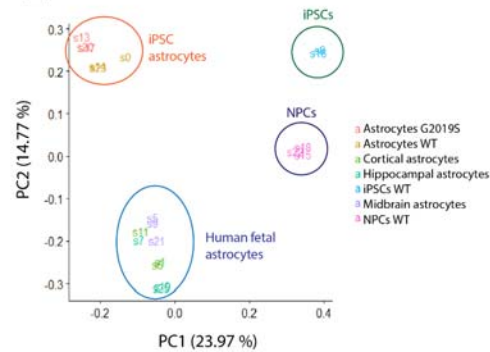

**F**

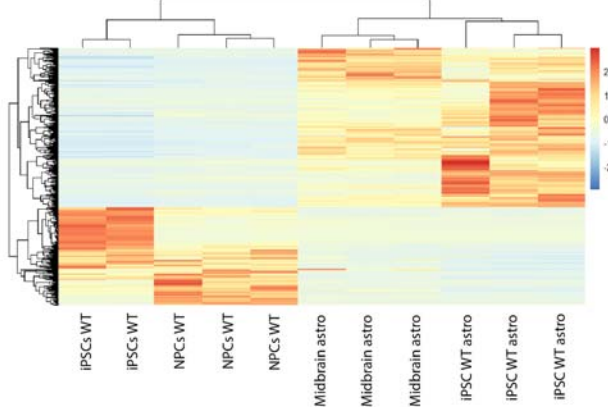



1 **Supplementary Figure 1. Quality control of iPSCs and iPSC-derived cell types.** (A) Normal  
2 human female karyotype prepared from WT and LRRK2 G2019S iPSCs. Cytogenetic analysis  
3 was performed on 20 G-banded metaphase cells for each genotype. (B) Representative  
4 heatmap showing the gene expression profile of NPCs patterned towards a midbrain fate. The  
5 left side of the heatmap identifies gene markers for specific brain regions (Kirkeby et al., 2012).  
6 Successfully differentiated NPCs should show higher expression levels of genes shown in the  
7 two black boxes (midbrain and floor plate) compared to other genes (Kirkeby et al., 2012; Kriks  
8 et al., 2011). The scale is calculated based on the  $1/\Delta$  cycle threshold (Ct) values calculated  
9 from the Ct of the gene of interest compared to the Ct of the loading control  $\beta$ -actin. (C)  
10 Confocal images of immunostained NPCs show expression of NPC markers vimentin (red),  
11 SOX1 (green), and merged vimentin (red) and SOX1 (green). The lower panel shows the  
12 expression of the markers nestin (red), notch1 (green), and merged nestin (red) and notch1  
13 (green). (D) Histogram representing the proportion of astrocytes expressing the marker CD44  
14 by flow cytometry in cultures prepared from human fetal midbrain astrocytes (89.55 % CD44<sup>+</sup>  
15 cells) or iPSC-derived astrocytes (88.54 % CD44<sup>+</sup> cells). A total of 10,000 events were recorded  
16 for each experimental condition. (E, F) To confirm the successful differentiation of iPSCs into  
17 specific cell types, we performed RNA-seq of iPSCs, NPCs, iPSC-derived astrocytes and  
18 human fetal astrocytes. RNA-seq data was analyzed by principal component analysis (PCA) (E)  
19 and a heatmap representing the unsupervised cluster analysis was generated (F); data are from  
20 two (iPSCs) or three (NPCs, iPSC-derived astrocytes and fetal astrocytes) independent  
21 biological replicates.

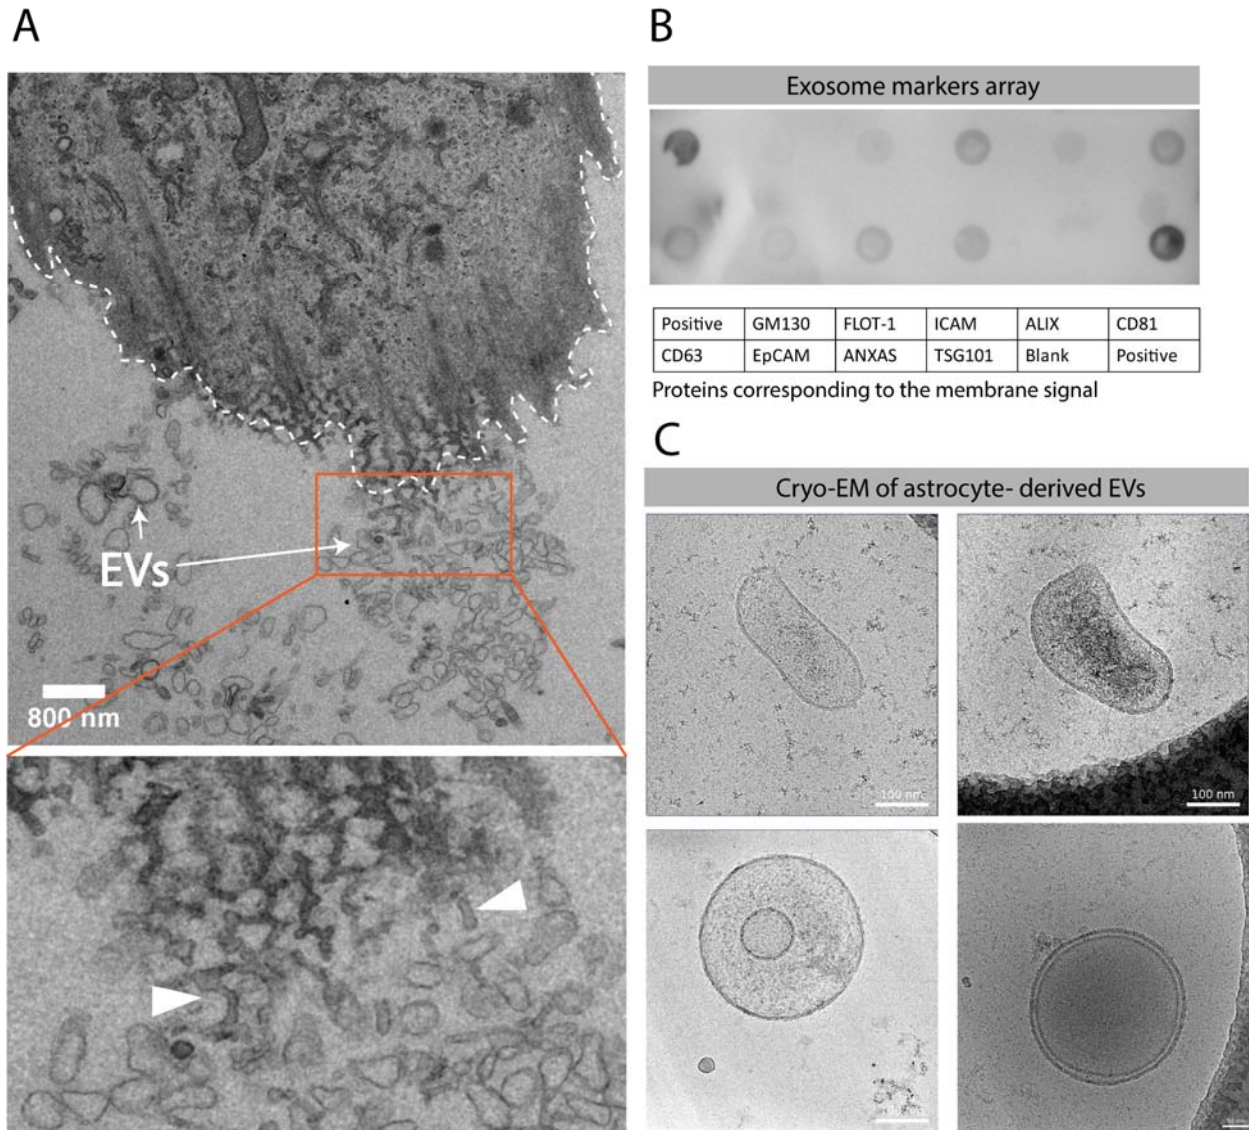

**Supplementary Figure 2. Analysis of astrocyte-secreted EVs.** (A) TEM image of an astrocyte and astrocyte-secreted EVs. The dashed line indicates the astrocyte cell membrane, and the arrows indicate EVs. The red box and the zoomed-in view show EVs that appear to bud from the astrocyte membrane (white arrowheads). (B) Identification of exosome markers in EV-enriched fractions obtained from ACM using an exosome antibody array. Each circle on the membrane represents a pre-printed antibody spot marker of exosome or cellular contaminant, and the table details the name of each antibody marker spotted on the membrane. (C) Cryo-EM images of astrocyte-derived EVs that display an unusual morphology.

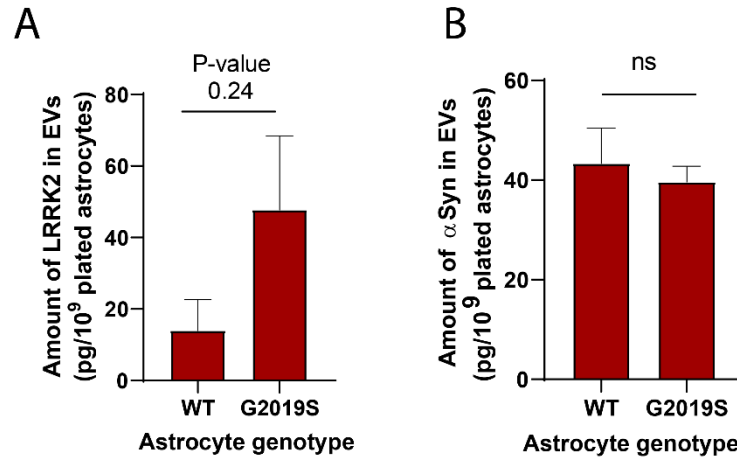

1  
2

3 **Supplementary Figure 3. Presence of PD-related proteins in astrocyte-derived EVs.** (A)  
4 Quantification of the amount of LRRK2 in WT or LRRK2 G2019S EV-enriched fractions by  
5 ELISA. Data are from at least three independent biological replicates. (B) Quantification of the  
6 amount of alpha-synuclein (αSyn) in WT and LRRK2 G2019S EV-enriched fractions by ELISA.  
7 Data are from seven independent biological replicates. For all datasets, error bars represent  
8 mean + SEM; statistical analysis was performed using two-tailed unpaired Student's t-test with  
9 equal s.d. (ns: not significant).

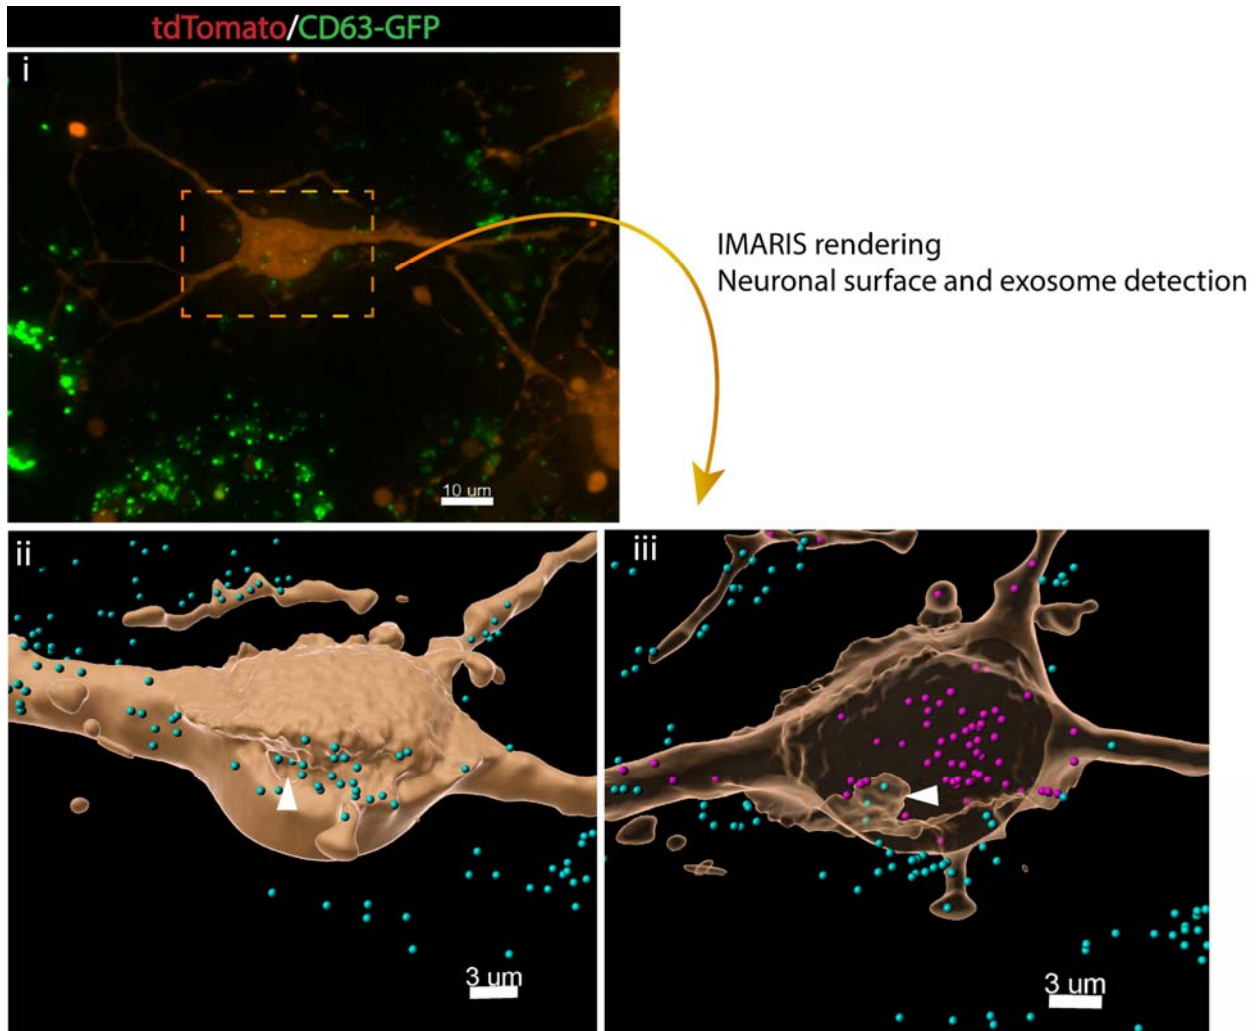

1

2

3 **Supplementary Figure 4. Dopaminergic neurons internalize astrocyte-derived EVs by**  
4 **endocytosis.** Widefield image of co-cultured tdTomato neurons (red) and CD63-GFP  
5 astrocytes (green) (4i). The dashed red box shows the neuronal soma, and the corresponding  
6 IMARIS software rendering represents the tdTomato neuron in yellow (4ii, 4iii), and the CD63-  
7 GFP EVs in blue (outside the neurons) or purple (inside the neurons). The white arrowhead  
8 shows the internal budding of the neuronal plasma membrane and endocytosis of extracellular  
9 CD63<sup>+</sup> exosomes.

10
